# Supplementary material
Source: PubMed Central journal article supplement (PMC3125668)
Supplement: NIHMS305759-supplement-Supplementary_Data.pdf [file NIHMS305759-supplement-Supplementary_Data.pdf]

## **Supporting Online Material for**

### **Neuronal GPCR Controls Innate Immunity by Regulating Non-Canonical Unfolded Protein Response Genes**

Jingru Sun, Varsha Singh, Rie Kajino-Sakamoto, and Alejandro Aballay\*

Department of Molecular Genetics and Microbiology, Duke University Medical Center,

Durham, North Carolina USA

\*To whom correspondence should be addressed. E-mail: [a.aballay@duke.edu](mailto:a.aballay@duke.edu)

**This PDF file includes:**

Materials and Methods

Figs. S1 to S9

Tables S1 to S6

References

## Materials and Methods

### Bacterial Strains

The following bacterial strains were used: *Escherichia coli* OP50 (1), *Pseudomonas aeruginosa* PA14 (2), *Salmonella enterica* serovar Typhimurium 1344 (3), *Salmonella enterica* SMO22 expressing GFP, *P. aeruginosa* expressing GFP. *E. coli*, *P. aeruginosa*, *S. enterica* cultures were grown in Luria-Bertani (LB) broth at 37°C.

### Nematode Strains

The following *C. elegans* strains were cultured under standard conditions and fed *E. coli* OP50 (1). Wild-type animals were *C. elegans* Bristol N2. *octr-1(ok371)*, *pmk-1(km25)*, *daf-16(mu86)*, *ced-1(e1735)*, *sek-1(km4)* and *pqe-1(rt13);rtIs11* strains were obtained from the *Caenorhabditis elegans* Genetics Center (University of Minnesota, Minneapolis, MN). The mutants *octr-1(ok371);sek-1(km4)*, *octr-1(ok371);ced-1(e1735)*, *octr-1(ok371);abu-1::gfp(zcEx8)*, and *octr-1(ok371);ced-1(e1735);abu-1::gfp(zcEx8)* were constructed using standard genetic techniques. FY745 *octr-1(ok371);grEx157 [Poctr-1::octr-1::gfp]* and FY746 *octr-1(ok371);grEx158 [Psra-6::octr-1]* were kind gifts from Dr. Richard W. Komuniecki (University of Toledo, Toledo, OH).

### *C. elegans* Killing Assay

*C. elegans* wild-type N2 animals and mutants were maintained as hermaphrodites at 20°C, grown on modified nematode growth medium (NGM) agar plates (0.35% instead of 0.25% peptone) and fed with *E. coli* OP50 as described (1). The bacterial lawns used for *C. elegans* killing assays were prepared by placing a 25µl drop of an overnight culture of the bacterial strains on modified NGM agar on plates 3.5cm in diameter. Full lawn plates used for *C. elegans* killing assays were prepared by spreading a 25µl drop of an overnight culture grown at 37°C of *P. aeruginosa* on the complete surface of modified NGM agar in 3.5cm diameter Petri plates. Plates were incubated at 37°C for 12~16 hours. Plates were cooled down at room temperature for at least one hour before seeding with synchronized young adult animals. The killing assays were performed at 25°C and live animals were transferred daily to fresh plates. Animals were scored at the times indicated and were considered dead when they failed to respond to touch.

### *C. elegans* Lifespan assay on Heat-Killed Bacteria.

*E. coli* OP50 or *P. aeruginosa* PA14 were grown as described above. Bacteria were concentrated 1:10 and then heat-killed at 65°C for 3 hours. Bacterial death was confirmed by failure to grow on LB plates at 37°C overnight. A 25µl drop of the killed bacteria was plated on a 3.5cm plate of modified NGM agar containing 50µg/ml ampicillin. The assays were performed at 25°C.

### Bacterial Lawn Avoidance Assay

The behavioral avoidance assay was performed as described (4). Briefly, small lawns of *P. aeruginosa* PA14 were cultured on 3.5cm NGM plates overnight at 37°C. Twenty young adult nematodes grown on *E. coli* OP50 were put in the center of each bacterial lawn. The number of nematodes was counted at 4, 6, 12, 24, 30 and 36 hours post-exposure for presence or absence on each lawn.

### **Profile of Bacterial Accumulation in the Nematode Intestine**

To determine the profiles of bacterial accumulation in the intestine, wild-type and *octr-1(ok371)* animals were synchronized by treatment of gravid adults with sodium hydroxide and bleach. Synchronized L1 larvae were grown on *E. coli* OP50 at 20°C until they had reached young adult stage. Wild-type and *octr-1(ok371)* animals were then transferred to plates seeded with either *P. aeruginosa*/GFP or *S. enterica*/GFP (SMO22) and cultured for 48 hours at 25°C. Animals were transferred to an NGM plate seeded with *E. coli* for 15 min and transferred again to a new NGM plate seeded with *E. coli* for 30 min to eliminate *P. aeruginosa*/GFP or *S. enterica*/GFP stuck to the body of the nematodes. Animals were visualized using a Leica MZ FLIII fluorescence stereomicroscope.

### **Quantification of Intestinal Bacterial Loads**

For the quantification of colony forming units (cfu), wild-type and *octr-1(ok371)* animals were synchronized by treatment of gravid adults with sodium hydroxide and bleach. Synchronized L1 larvae were grown on *E. coli* OP50 at 20°C until they had reached young adult stage. Wild-type and *octr-1(ok371)* animals were then transferred to plates seeded with either *P. aeruginosa*/GFP or *S. enterica*/GFP (SMO22) for 48 hours at 25°C. Animals were transferred to an NGM plate seeded with *E. coli* for 15 min to eliminate *P. aeruginosa*/GFP or *S. enterica*/GFP stuck to the body of the worms. Animals were transferred to a new NGM plate seeded with *E. coli* for 30min to further eliminate external *P. aeruginosa*/GFP or *S. enterica*/GFP. Ten nematodes per condition were transferred into 50 microliters PBS plus 0.1% Triton and ground. Serial dilutions of the lysates ( $10^{-1}$ ,  $10^{-2}$ ,  $10^{-3}$ ,  $10^{-4}$ ) were plated onto LB/kanamycin to select for *P. aeruginosa*/GFP or *S. enterica*/GFP cells and grown for 24 hours at 37°C.

### **RNA Interference**

RNA interference was used to generate loss-of-function RNAi phenotypes by feeding nematodes with *E. coli* strain HT115(DE3) expressing double-stranded RNA (dsRNA) that is homologous to a target gene (5, 6). Briefly, *E. coli* with the appropriate vectors were grown in LB broth containing ampicillin (100µg/ml) at 37°C overnight and plated onto NGM plates containing 100µg/ml ampicillin and 3mM isopropyl β-D-thiogalactoside (IPTG). RNAi-expressing bacteria were allowed to grow overnight at 37°C. L2 or L3 larval animals were placed on RNAi or vector control plates for 2 days at 20°C until nematodes became gravid. Gravid adults were then transferred to fresh RNAi-expressing bacterial lawns and allowed to lay eggs for 2 hours to synchronize a second generation RNAi population. The gravid adults were removed and eggs were allowed to develop at 20°C to reach L4s for subsequent assays. *unc-22* RNAi was included as a positive control in all experiments to account for RNAi efficiency.

Given the high sequence similarity among *pqn/abu* genes, the occurrence of cross-RNAi within the family is likely. In *C. elegans*, cross-RNAi is known to occur when a target mRNA shares at least 95% identity, over a span of 40 or more nucleotides, to the dsRNA encoded by the RNAi construct (7). To identify potential off-target cross-reactions, the BLAST algorithm was used. Our analysis revealed potential off-target cross-reactions within the *pqn/abu* family for the *abu-1*, *abu-7*, and *abu-8* constructs

(Table S6). No potential off-target cross-reactions for the *pqn-40/abu-12* and *pqn-46/abu-13* RNAi construct was observed (Table S6).

### **Tunicamycin Treatment**

Tunicamycin plates were prepared by making NGM plates containing 5 µg/ml of tunicamycin dissolved in DMSO or control plates containing DMSO alone. One day old plates that were seeded with *E. coli* OP50 were used. Wild-type and *xbp-1(zc12)* animals at L4 stage were transferred to tunicamycin or control plates for 5 hours at 20°C. The animals were harvested from the plates at the end of the treatment and used for RNA extraction followed by qRT-PCR analysis.

### **Western Blot Analysis**

Whole-worm lysates were prepared in the presence of protease inhibitors. Active PMK-1 was detected using an anti-human p38 antibody from Promega, Inc. Actin was detected using a polyclonal antibody from Sigma. Blots were developed using SuperSignal chemiluminescence substrate (Pierce).

### **RNA Isolation**

Gravid adult wild-type and *octr-1(ok371)* animals were lysed using a solution of sodium hydroxide and bleach (ratio of 5:2), washed and the eggs were synchronized for 22 hours in S basal liquid medium at room temperature. Synchronized L1 larval animals were placed onto NGM plates seeded with *E. coli* OP50 and grown at 20°C until the animals had reached the L4 larval stage. Animals were collected and washed with M9 buffer before transferring to NGM plates containing *E. coli* OP50 or *P. aeruginosa* PA14 for 4 hours at 25°C. After 4 hours, animals were collected and washed with M9 buffer, and RNA was extracted using TRIzol reagent (Invitrogen). Residual genomic DNA was removed by DNase treatment (Ambion Austin, TX).

### **Microarray Analysis**

Total RNA was obtained as described above. cDNA was generated from 10 µg of total RNA and samples were hybridized to the *C. elegans* GeneChip (Affymetrix, Santa Clara, CA) by the Duke Microarray Facility. Detailed protocols are available on the Duke Microarray Facility Web site (<http://microarray.genome.duke.edu>). Microarray data were subjected to the robust multichip averaging algorithm using GeneSpring GX software (Agilent Technologies, Santa Clara, CA). Analysis of variance *t* test and fold-change calculations were also performed using GeneSpring GX software. Probability calculations of enrichment were performed using the hypergeometric probability test ([http://elegans.uky.edu/MA/progs/overlap\\_stats.html](http://elegans.uky.edu/MA/progs/overlap_stats.html)) to calculate the statistical significance of the overlap of gene groups. The GEO accession number for the microarray data is GSE27867.

### **Quantitative Real-Time PCR (qRT-PCR)**

Total RNA was obtained as described above. qRT-PCR was conducted using the Applied Biosystems One-Step Real-time PCR protocol using SYBR Green fluorescence (Applied Biosystems) on an Applied Biosystems 7900HT real-time PCR machine in 96-well plate format. Fifty nanograms of RNA were used for real-time PCR. Twenty-five microliter

reactions were set-up and performed as outlined by the manufacturer (Applied Biosystems). Relative fold-changes for transcripts were calculated using the comparative  $C_T(2^{-\Delta\Delta CT})$  method (8) and normalized to pan-actin (*act-1*, -3, -4). Cycle thresholds of amplification were determined by StepOnePlus software (Applied Biosystems). All samples were run in triplicate. Primer sequences are available upon request.

### **Statistical Analysis**

Animal survival was plotted as a non-linear regression curve using the PRISM (version 4.00) computer program. Survival curves were considered different than the appropriate control indicated in the main text when p-values were <0.05. Prism uses the product limit or Kaplan-Meier method to calculate survival fractions and the logrank test, which is equivalent to the Mantel-Heanszel test, to compare survival curves. A two-sample *t* test for independent samples was used to analyze the avoidance assay, cfu assay and qRT-PCR results; p-values <0.05 are considered significant. For Fig. 3B and Fig. 4C, student's exact *t*-test indicates that all differences between wild type and *octr-1(ok371)* are significantly different (P<0.05). All the experiments were repeated at least 3 times, unless otherwise indicated.

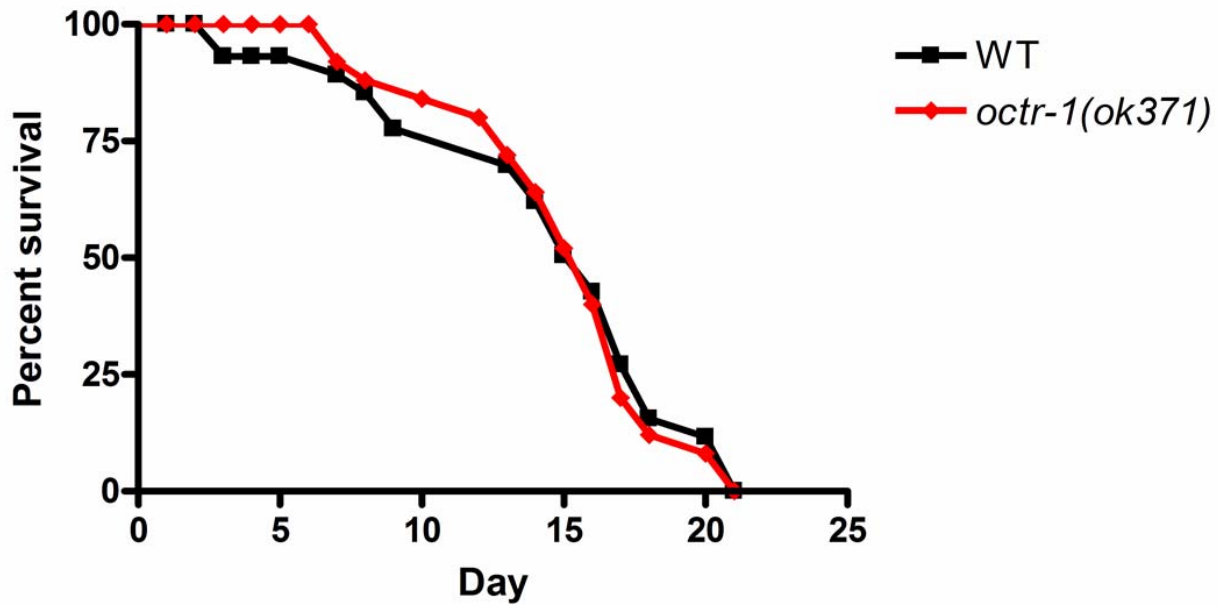

**Fig. S1:** *octr-1(ok371)* animals exhibit wild-type lifespan on heat-killed *E. coli* OP50. Wild-type and *octr-1(ok371)* ( $P=0.8297$ ) animals were exposed to heat-killed *E. coli* OP50 and scored for survival over time. Shown is a representative assay of two independent experiments.  $N=45$  adult animals per strain.

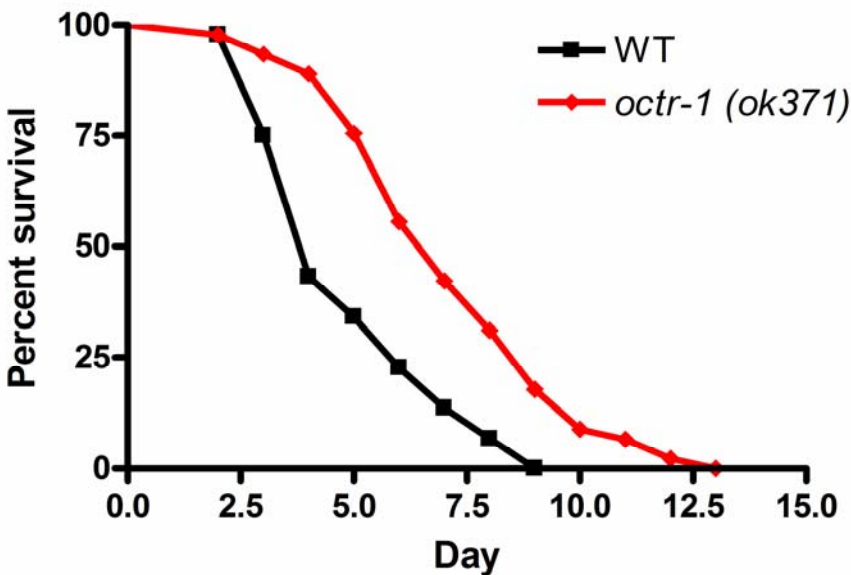

**Fig. S2:** *octr-1(ok371)* animals are resistant to *Salmonella enterica*. Wild-type and *octr-1(ok371)* ( $P<0.0001$ ) animals were exposed to *S. enterica* strain 1344 and scored for survival over time. Shown is a representative assay of three independent experiments.  $N=45$  adult animals per strain.

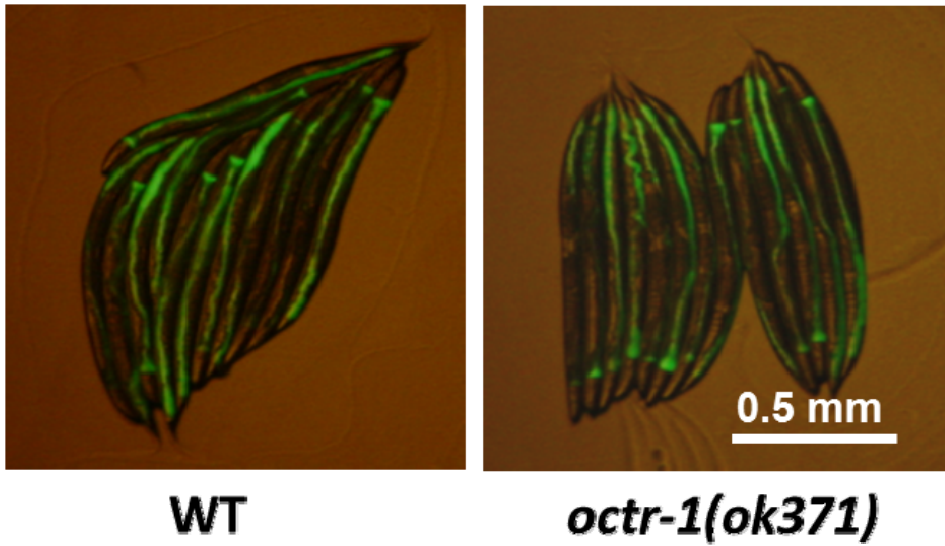

**Fig. S3:** *S. enterica* bacterial accumulation in the intestinal lumen is comparable in wild-type and *octr-1(ok371)* animals. Wild-type and *octr-1(ok371)* animals were fed *S. enterica* expressing GFP for 48 hours and then visualized using a MZ FLIII Leica stereomicroscope.

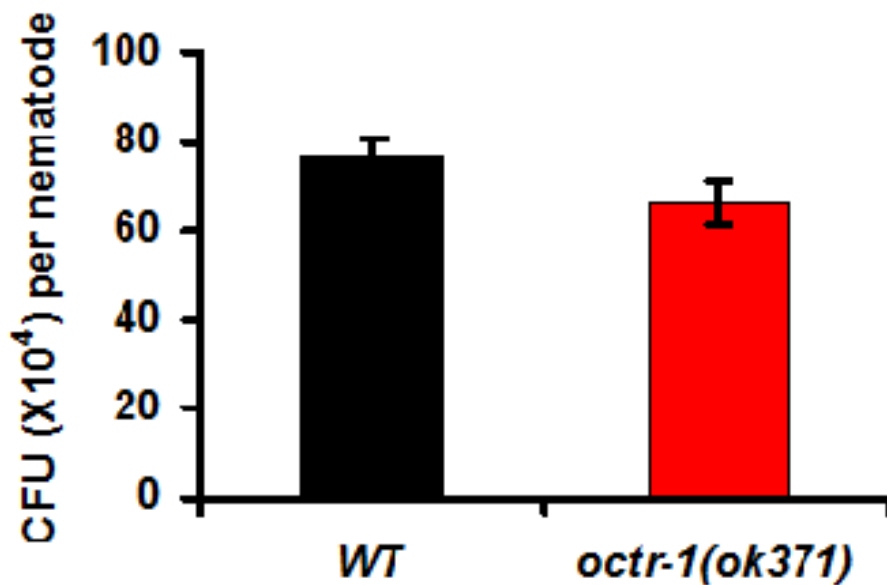

**Fig. S4:** *S. enterica* bacterial load is comparable in wild-type and *octr-1(ok371)* animals. Wild-type and *octr-1(ok371)* animals were fed *S. enterica* expressing GFP for 48 hours and the colony forming units were quantified. Ten animals were used for each condition. Three independent experiments were performed.

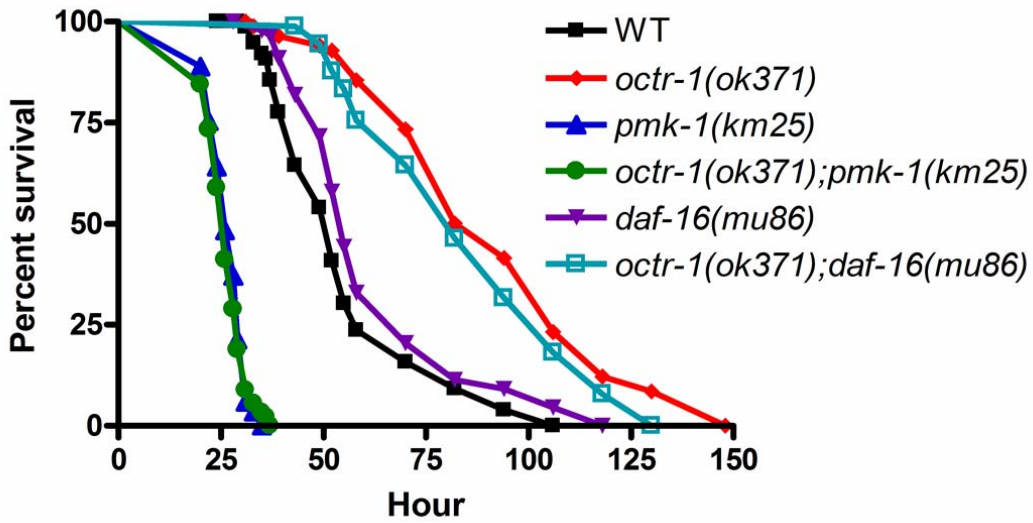

**Fig. S5:** Wild-type, *octr-1(ok371)*, *pmk-1(km25)*, *octr-1(ok371);pmk-1(km25)*, *daf-16(mu86)*, and *octr-1(ok371);daf-16(mu86)* animals were exposed to *P. aeruginosa* and scored for survival over time. Shown is a representative assay of two independent experiments. N=45 adult animals per strain. Wild-type ( $P < 0.0001$ ), *pmk-1(km25)* ( $P < 0.0001$ ), *octr-1(ok371);pmk-1(km25)* ( $P < 0.0001$ ), *daf-16(mu86)* ( $P < 0.0001$ ), *octr-1(ok371);daf-16(mu86)* ( $P > 0.05$ ). P values are relative to *octr-1(ok371)* animals.

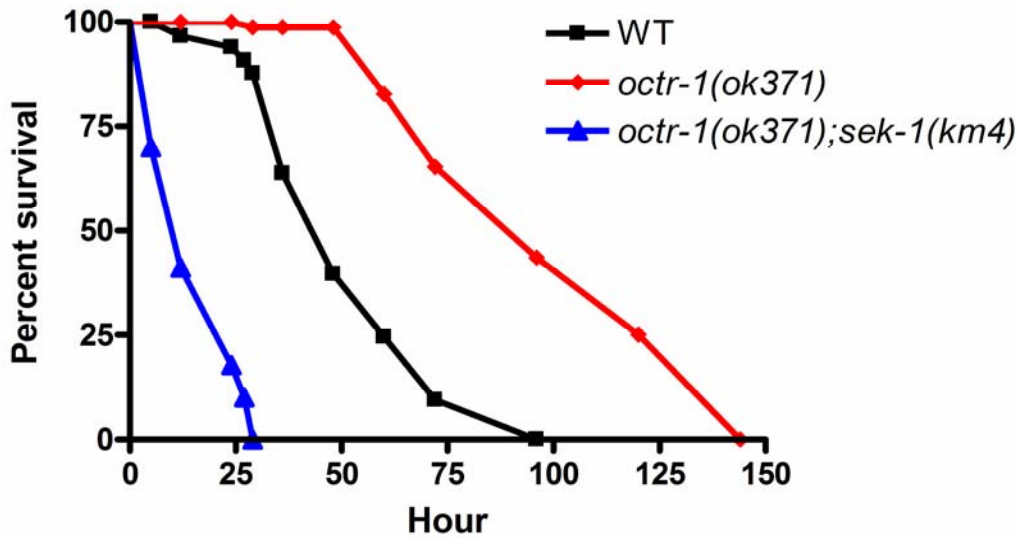

**Fig. S6:** Wild-type, *octr-1(ok371)*, and *octr-1(ok371);sek-1(km4)* animals were exposed to *P. aeruginosa* and scored for survival over time. Shown is a representative assay of two independent experiments. N=45 adult animals per strain. *octr-1(ok371)* ( $P < 0.0001$ ), *octr-1(ok371);sek-1(km4)* ( $P < 0.0001$ ). P values are relative to wild-type animals.



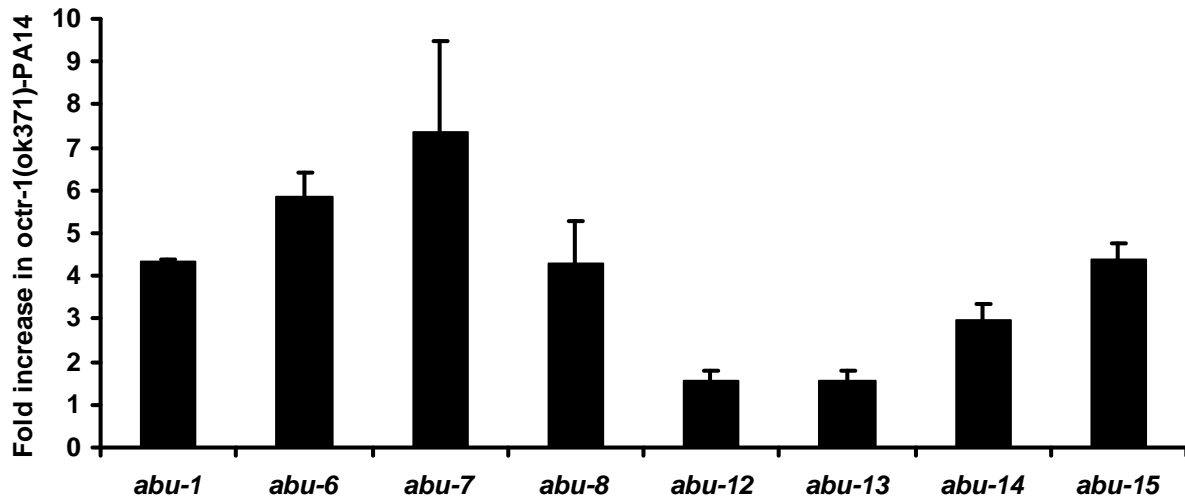

**Fig. S7:** Quantitative reverse transcription-PCR analysis of *abu* gene expression in *octr-1(ok371)* animals infected with *P. aeruginosa* PA14 relative to *octr-1(ok371)* animals fed *E. coli* OP50. Data were analyzed by normalization to pan-actin (*act-1*, -3, -4) and relative quantification using the comparative cycle threshold method. Shown is the average of two independent experiments. Error bars are shown.

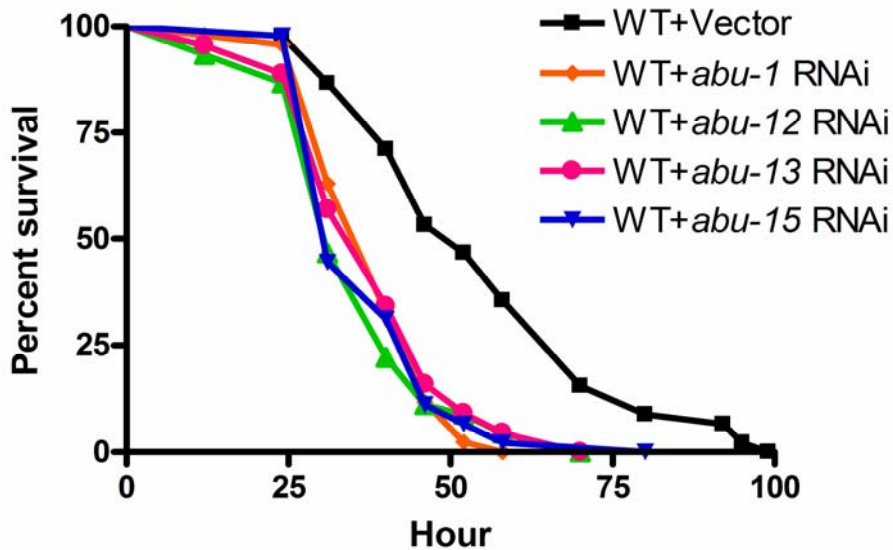

**Fig. S8:** *abu* genes expressed in an OCTR-1-dependent manner are required for *C. elegans* immunity against *P. aeruginosa*. Wild-type animals grown on dsRNA for vector control or dsRNA for *abu* genes were exposed to *P. aeruginosa*. *abu-1* RNAi ( $P < 0.0001$ ), *abu-12* RNAi ( $P < 0.0001$ ), *abu-13* RNAi ( $P < 0.0001$ ), *abu-15* RNAi ( $P < 0.0001$ ). P values are relative to wild-type animals. Shown is a representative assay of two independent experiments. N=45 adult animals per strain.

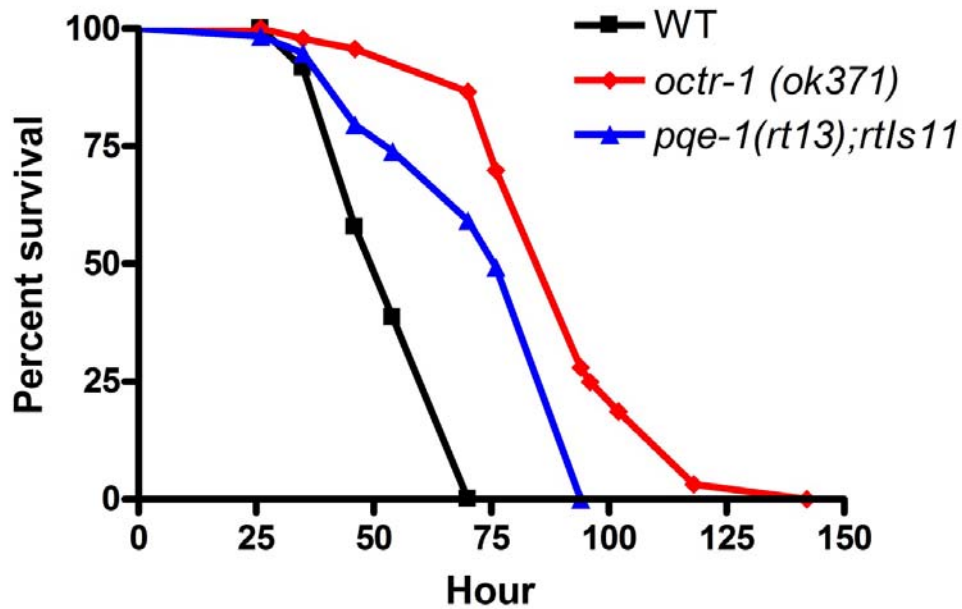

**Fig. S9:** Wild-type, *octr-1(ok371)*, and *pqe-1(rt13);rtIs11* animals were exposed to *P. aeruginosa* and scored for survival over time. The graph is a representative assay of three independent experiments, N=60 adult animals per strain. *octr-1(ok371)* (P<0.0001), *pqe-1(rt13);rtIs11* (P=0.003). P values are relative to wild-type animals.

Table S1.

| <b><u>Probe Set ID</u></b> | <b><u>Gene Symbol</u></b> | <b><u>Gene Name</u></b> | <b><u>Description</u></b>       | <b><u>Fold change</u></b> | <b><u>Corrected P value</u></b> |
|----------------------------|---------------------------|-------------------------|---------------------------------|---------------------------|---------------------------------|
| 188046_s_at                | F57F4.3                   | gfi-1                   | GEI-4(Four) Interacting protein | 38.43                     | 0.0014                          |
| 190340_s_at                | ZK678.5                   | wrt-4                   | WaRThog (hedgehog-like family)  | 37.41                     | 0.0014                          |
| 191688_at                  | F15B9.8                   |                         | Thrombospondin type 1 domain    | 33.69                     | 0.0014                          |
| 177729_at                  | E01G4.6                   |                         |                                 | 28.59                     | 0.0014                          |
| 189762_at                  | K09H9.3                   | col-49                  | COLlagen                        | 27.50                     | 0.0015                          |
| 188747_at                  | Y54E10BL.2                | col-48                  | COLlagen                        | 26.57                     | 0.0023                          |
| 177942_at                  | F33A8.7                   |                         |                                 | 26.37                     | 0.0017                          |
| 173004_s_at                | T02E9.2                   | grl-7                   | GRound-Like (grd related)       | 25.99                     | 0.0021                          |
| 183379_at                  | K01D12.9                  |                         |                                 | 25.45                     | 0.0030                          |
| 182104_at                  | ZK1025.3                  |                         |                                 | 25.24                     | 0.0017                          |
| 173235_at                  | Y38C1BA.3                 | col-109                 | COLlagen                        | 25.13                     | 0.0023                          |
| 173083_s_at                | H10E21.4                  |                         | calcium-binding protein         | 24.69                     | 0.0042                          |
| 182561_at                  | Y11D7A.9                  |                         |                                 | 23.11                     | 0.0017                          |

|             |            |         |                                                     |       |        |
|-------------|------------|---------|-----------------------------------------------------|-------|--------|
| 183237_s_at | ZK180.5    |         |                                                     | 21.89 | 0.0021 |
| 185593_at   | H23N18.5   |         |                                                     | 20.77 | 0.0022 |
| 183975_s_at | F57B9.9    | pqn-46  | Prion-like-(Q/N-rich)-domain-bearing protein        | 20.49 | 0.0014 |
| 173611_s_at | y11d7a.11  | col-120 | COLlagen                                            | 20.17 | 0.0021 |
| 174152_s_at | C09G5.6    | bli-1   | BLIstered cuticle                                   | 20.05 | 0.0024 |
| 178715_at   | C33G3.3    | lgc-21  | Ligand-Gated ion Channel                            | 19.76 | 0.0023 |
| 183913_s_at | T10E9.3    |         |                                                     | 19.67 | 0.0028 |
| 180505_at   | F29C12.1   | pqn-32  | Prion-like-(Q/N-rich)-domain-bearing protein        | 19.62 | 0.0015 |
| 184102_s_at | ZK1025.2   |         |                                                     | 19.40 | 0.0027 |
| 184102_s_at | ZK1025.8   |         |                                                     | 19.40 | 0.0027 |
| 189482_s_at | C35B8.1    | col-175 | COLlagen                                            | 19.36 | 0.0034 |
| 174660_at   | T19A5.3    |         |                                                     | 19.11 | 0.0014 |
| 188337_at   | Y57A10A.11 | rol-1   | ROLLER: helically twisted, animals roll when moving | 18.96 | 0.0017 |
| 177451_at   | ZC373.6    | dao-4   | Dauer or Aging adult Overexpression                 | 18.88 | 0.0021 |
| 193327_at   | F53B1.4    |         | thymidine diphosphoglucose 4,6-dehydratase          | 18.68 | 0.0015 |
| 180664_s_at | ZK180.6    |         |                                                     | 18.56 | 0.0014 |

|             |            |         |                                     |       |        |
|-------------|------------|---------|-------------------------------------|-------|--------|
| 172989_s_at | R11A5.7    |         | zinc carboxypeptidase               | 18.39 | 0.0027 |
| 190360_s_at | F27C1.8    | dpy-5   | DumPY : shorter than wild-type      | 18.23 | 0.0020 |
| 172497_x_at | R12E2.15   |         |                                     | 18.15 | 0.0032 |
| 183666_at   | C52D10.13  | col-138 | COLlagen                            | 18.06 | 0.0017 |
| 180376_s_at | M03A1.7    | dao-2   | Dauer or Aging adult Overexpression | 17.99 | 0.0032 |
| 175008_at   | F10D11.6   |         |                                     | 17.92 | 0.0014 |
| 174661_s_at | T19A5.3    |         |                                     | 17.46 | 0.0029 |
| 192674_s_at | B0491.2    | sqt-1   | SQuaT                               | 17.40 | 0.0017 |
| 179686_at   | C38C6.6    | tag-297 | Temporarily Assigned Gene name      | 16.95 | 0.0025 |
| 189968_s_at | F54C9.4    | col-38  | COLlagen                            | 16.92 | 0.0015 |
| 176459_at   | Y102A11A.5 |         |                                     | 16.88 | 0.0036 |
| 172346_x_at | R12E2.7    |         |                                     | 16.79 | 0.0039 |
| 186974_s_at | Y49F6B.10  | col-71  | COLlagen                            | 16.29 | 0.0017 |
| 172547_x_at | R12E2.14   |         |                                     | 15.79 | 0.0040 |
| 188037_at   | ZK377.1    | wrt-6   | WaRThog (hedgehog-like family)      | 15.52 | 0.0015 |
| 185764_s_at | F33D4.6    |         |                                     | 15.29 | 0.0023 |

|             |           |         |                                                                  |       |        |
|-------------|-----------|---------|------------------------------------------------------------------|-------|--------|
| 189797_s_at | F58F6.1   | col-104 | COLlagen                                                         | 15.00 | 0.0029 |
| 173576_at   | ZK180.5   |         |                                                                  | 14.91 | 0.0022 |
| 194203_x_at | W04G3.8   | lpr-3   | LiPocalin-Related protein                                        | 14.82 | 0.0023 |
| 174960_at   | ZK1010.7  | col-97  | COLlagen                                                         | 14.53 | 0.0029 |
| 188028_at   | T18H9.1   | grd-6   | GRoundhog (hedgehog-like family)                                 | 14.52 | 0.0035 |
| 186927_s_at | Y65B4BR.6 | grl-16  | GRound-Like (grd related)                                        | 13.99 | 0.0017 |
| 177696_at   | C30H6.5   |         |                                                                  | 13.99 | 0.0024 |
| 185424_s_at | F33D4.6   |         |                                                                  | 13.88 | 0.0030 |
| 191001_s_at | H10E21.4  |         | calcium-binding protein                                          | 13.87 | 0.0020 |
| 171795_x_at | R12E2.14  |         |                                                                  | 13.72 | 0.0041 |
| 188635_at   | F58E6.13  |         |                                                                  | 13.06 | 0.0021 |
| 183724_at   | Y11D7A.5  |         |                                                                  | 13.04 | 0.0046 |
| 174240_at   | C34G6.6   | noah-1  | NOmpA Homolog (Drosophila nompA: no mechanoreceptor potential A) | 12.84 | 0.0031 |
| 188463_at   | F22D6.10  | col-60  | COLlagen                                                         | 12.79 | 0.0040 |
| 175016_s_at | F44E2.4   |         |                                                                  | 12.74 | 0.0024 |

|             |           |         |                                                             |       |        |
|-------------|-----------|---------|-------------------------------------------------------------|-------|--------|
| 181956_at   | C09E8.2   | lips-7  | LIPaSe related                                              | 12.74 | 0.0025 |
| 188364_s_at | F08G5.4   | col-130 | COLlagen                                                    | 12.73 | 0.0021 |
| 192967_at   | ZK1290.3  | rol-8   | ROLLER: helically twisted, animals roll when moving         | 12.66 | 0.0029 |
| 191036_at   | F10F2.3   | lips-3  | LIPaSe related                                              | 12.57 | 0.0029 |
| 188705_s_at | T06D8.10  |         | peroxidase                                                  | 12.47 | 0.0035 |
| 176471_at   | Y47D7A.13 |         |                                                             | 12.43 | 0.0033 |
| 181707_at   | F10D11.6  |         |                                                             | 12.41 | 0.0017 |
| 188853_at   | R07E5.4   |         | Glutaredoxin                                                | 12.32 | 0.0024 |
| 173654_at   | C42D8.5   | acn-1   | ACE(angiotensin converting enzyme)-like Non-peptidase       | 12.26 | 0.0020 |
| 192026_at   | C46A5.3   | col-14  | COLlagen                                                    | 12.11 | 0.0043 |
| 183230_at   | R02E4.1   |         |                                                             | 12.00 | 0.0068 |
| 185862_at   | Y59A8B.20 | lon-8   | LONg                                                        | 11.88 | 0.0014 |
| 183159_at   | F09F9.2   |         |                                                             | 11.85 | 0.0035 |
| 186362_s_at | H04M03.4  | glf-1   | GaLactoFuranose synthesis (UGM, UDP-galactopyranose mutase) | 11.56 | 0.0014 |
| 180375_at   | M03A1.8   |         | Dauer or Aging adult Overexpression                         | 11.34 | 0.0025 |

|             |            |        |                                                     |       |        |
|-------------|------------|--------|-----------------------------------------------------|-------|--------|
| 192682_at   | T01B7.7    | rol-6  | ROlLer: helically twisted, animals roll when moving | 11.27 | 0.0017 |
| 180439_at   | C26B9.3    |        |                                                     | 11.07 | 0.0014 |
| 190193_s_at | R11A5.7    |        | zinc carboxypeptidase                               | 10.76 | 0.0019 |
| 174448_s_at | F28D1.9    |        |                                                     | 10.69 | 0.0016 |
| 187073_at   | Y57A10A.23 |        |                                                     | 10.69 | 0.0034 |
| 174628_s_at | H03E18.1   |        |                                                     | 10.64 | 0.0032 |
| 185468_at   | Y75B8A.20  | grl-15 | GRound-Like (grd related)                           | 10.46 | 0.0048 |
| 182966_at   | ZK154.1    |        |                                                     | 10.37 | 0.0021 |
| 185646_at   | T01B10.2   | grd-14 | GRounDhog (hedgehog-like family)                    | 10.37 | 0.0034 |
| 189099_at   | M195.1     | col-77 | COLlagen                                            | 10.23 | 0.0017 |
| 172353_x_at | C02E7.6    |        |                                                     | 10.18 | 0.0047 |
| 185949_at   | C42D4.13   |        |                                                     | 9.75  | 0.0044 |
| 180614_at   | T17H7.7    |        |                                                     | 9.68  | 0.0015 |
| 190479_s_at | T05C12.10  | qua-1  | QUAhog (hedgehog related)                           | 9.67  | 0.0030 |
| 186760_at   | Y51H7C.13  |        |                                                     | 9.50  | 0.0022 |
| 187885_at   | C02D5.1    | acdh-6 | Acyl CoA DeHydrogenase                              | 9.47  | 0.0017 |



|             |           |          |                                                  |      |        |
|-------------|-----------|----------|--------------------------------------------------|------|--------|
| 183907_at   | ZK1025.7  |          |                                                  | 9.46 | 0.0027 |
| 190093_at   | W05G11.3  | col-88   | COLlagen                                         | 9.44 | 0.0015 |
| 172706_x_at | F53F1.4   |          | cuticlin                                         | 9.41 | 0.0017 |
| 177489_at   | C05E7.2   |          |                                                  | 9.41 | 0.0043 |
| 194238_x_at | F09B12.1  | mlt-9    | MoLTing defective                                | 9.35 | 0.0017 |
| 194187_x_at | W01F3.3   | mlt-11   | MoLTing defective                                | 9.35 | 0.0044 |
| 182327_at   | W08F4.6   | mlt-8    | MoLTing defective                                | 9.34 | 0.0015 |
| 172741_x_at | F41F3.3   |          | cuticlin                                         | 9.33 | 0.0029 |
| 188404_at   | W06B11.4  | hog-1    | HOG only (Hedgehog Hog domain alone)             | 9.33 | 0.0017 |
| 172799_x_at | F53F1.5   |          | cuticlin                                         | 9.31 | 0.0019 |
| 187358_at   | F07F6.5   | dct-5    | DAF-16/FOXO Controlled, germline Tumor affecting | 9.18 | 0.0086 |
| 179510_at   | F58H1.2   |          |                                                  | 9.14 | 0.0035 |
| 184684_at   | Y53F4B.27 |          |                                                  | 9.13 | 0.0031 |
| 188391_at   | F59E12.12 | bli-2    | BLIstered cuticle                                | 8.99 | 0.0049 |
| 189221_at   | F28G4.1   | cyp-37B1 | CYtochrome P450 family                           | 8.95 | 0.0047 |

|             |          |          |                                                    |      |        |
|-------------|----------|----------|----------------------------------------------------|------|--------|
| 187278_at   | C28H8.5  |          |                                                    | 8.83 | 0.0046 |
| 173518_s_at | C34D4.15 | col-113  | COLlagen                                           | 8.80 | 0.0027 |
| 174910_at   | F23H12.4 | sqt-3    | SQuaT                                              | 8.68 | 0.0030 |
| 175552_at   | F49E12.6 |          | RBB3 like protein                                  | 8.58 | 0.0021 |
| 184194_s_at | ZK1025.7 |          |                                                    | 8.51 | 0.0035 |
| 183818_s_at | C05E7.1  |          |                                                    | 8.46 | 0.0017 |
| 172325_x_at | C02E7.7  |          |                                                    | 8.41 | 0.0037 |
| 180462_at   | C07E3.10 |          |                                                    | 8.39 | 0.0049 |
| 177032_at   | F09G8.6  | col-91   | COLlagen                                           | 8.27 | 0.0068 |
| 174880_at   | T23F2.1  | bus-8    | Bacterially Un-Swollen (M. nematophilum resistant) | 8.21 | 0.0036 |
| 182320_at   | F18G5.2  | pes-8    | Patterned Expression Site                          | 8.13 | 0.0020 |
| 177650_at   | W04G3.8  | lpr-3    | LiPocalin-Related protein                          | 8.06 | 0.0038 |
| 177247_at   | BE10.2   |          |                                                    | 8.05 | 0.0019 |
| 192712_at   | F32E10.3 | clec-180 | C-type LECtin                                      | 7.96 | 0.0034 |
| 179650_at   | K08D8.4  |          |                                                    | 7.94 | 0.0062 |
| 193712_s_at | C14F11.6 |          | DTDP-4-dehydrorhamnose 3,5-epimerase (RFBC gene)   | 7.93 | 0.0075 |

|             |           |          |                             |      |        |
|-------------|-----------|----------|-----------------------------|------|--------|
| 173650_s_at | ZK265.2   | col-63   | COLlagen                    | 7.92 | 0.0025 |
| 190091_at   | C01B12.1  | sqt-2    | SQuaT                       | 7.92 | 0.0017 |
| 190091_at   | C01B12.8  |          |                             | 7.92 | 0.0017 |
| 187162_s_at | Y38A10A.2 |          |                             | 7.83 | 0.0042 |
| 181410_s_at | F26G1.5   |          |                             | 7.82 | 0.0032 |
| 178517_at   | C49F8.3   |          |                             | 7.80 | 0.0015 |
| 177586_at   | C15C6.1   |          |                             | 7.68 | 0.0032 |
| 175015_at   | F44E2.4   |          |                             | 7.66 | 0.0018 |
| 177916_at   | W04G3.3   | lpr-4    | LiPocalin-Related protein   | 7.60 | 0.0076 |
| 181681_at   | F08F1.6   | spp-13   | SaPosin-like Protein family | 7.60 | 0.0029 |
| 188276_s_at | C50B6.4   | col-161  | COLlagen                    | 7.57 | 0.0044 |
| 188276_s_at | Y2H9A.3   | col-162  | COLlagen                    |      | 0.0044 |
| 184220_at   | C56C10.4  |          |                             | 7.55 | 0.0017 |
| 189678_at   | F49E12.6  |          | RBB3 like protein           | 7.54 | 0.0020 |
| 177801_at   | C29F3.5   | clec-230 | C-type LECTin               | 7.49 | 0.0051 |
| 185972_at   | H42K12.3  |          |                             | 7.48 | 0.0043 |

|             |          |        |                                |      |        |
|-------------|----------|--------|--------------------------------|------|--------|
| 176681_at   | F35B3.4  |        |                                | 7.47 | 0.0097 |
| 187329_at   | T19C3.2  |        |                                | 7.47 | 0.0030 |
| 181055_at   | T19D7.3  |        |                                | 7.42 | 0.0038 |
| 180485_s_at | C45B2.7  | ptr-4  | PaTched Related family         | 7.35 | 0.0027 |
| 184676_s_at | ZK1290.8 | wrt-10 | WaRThog (hedgehog-like family) | 7.26 | 0.0033 |
| 187901_s_at | ZK13.4   | mab-7  | Male ABnormal                  | 7.21 | 0.0028 |
| 175115_at   | Y64H9A.2 |        |                                | 7.14 | 0.0035 |
| 188066_at   | C24B5.3  | ptr-1  | PaTched Related family         | 7.12 | 0.0014 |
| 192504_at   | T22H6.2  |        |                                | 7.12 | 0.0033 |
| 184174_at   | ZC204.12 |        |                                | 7.11 | 0.0051 |
| 183941_s_at | F56D3.1  |        |                                | 7.05 | 0.0034 |
| 173567_s_at | T02E9.2  | grl-7  | GRound-Like (grd related)      | 7.00 | 0.0025 |
| 183361_at   | K01D12.8 |        |                                | 7.00 | 0.0044 |
| 180616_at   | T22B7.3  |        |                                | 6.99 | 0.0014 |
| 184828_s_at | F09B12.1 | mlt-9  | MoLTing defective              | 6.92 | 0.0026 |
| 190877_at   | C07D10.4 | nas-7  | Nematode AStacin protease      | 6.89 | 0.0019 |

|             |           |         |                                                                  |      |        |
|-------------|-----------|---------|------------------------------------------------------------------|------|--------|
| 174481_at   | C45G9.6   |         |                                                                  | 6.85 | 0.0035 |
| 188311_s_at | F38A3.2   | ram-2   | abnormal RAy Morphology                                          | 6.79 | 0.0026 |
| 175393_at   | Y47D7A.13 |         | status:Partially_confirmed                                       | 6.67 | 0.0051 |
| 184106_at   | M03F8.1   |         |                                                                  | 6.64 | 0.0063 |
| 173124_s_at | H42K12.3  |         |                                                                  | 6.55 | 0.0032 |
| 178189_at   | F28C6.5   |         |                                                                  | 6.53 | 0.0029 |
| 171796_x_at | C02E7.6   |         |                                                                  | 6.45 | 0.0042 |
| 193741_at   | T03G11.8  | zig-6   | 2 (Zwei) IG-domain protein                                       | 6.43 | 0.0049 |
| 188461_s_at | F29B9.9   | col-111 | COLlagen                                                         | 6.42 | 0.0024 |
| 178131_at   | T16G1.2   |         |                                                                  | 6.40 | 0.0019 |
| 188312_at   | F57B7.3   | col-156 | COLlagen                                                         | 6.39 | 0.0043 |
| 181440_at   | D1014.5   |         |                                                                  | 6.32 | 0.0032 |
| 181069_at   | T03G6.1   |         |                                                                  | 6.31 | 0.0072 |
| 181136_s_at | F52B11.3  | noah-2  | NOmpA Homolog (Drosophila nompA: no mechanoreceptor potential A) | 6.29 | 0.0029 |
| 174294_at   | C25F6.7   |         |                                                                  | 6.26 | 0.0030 |

|             |            |         |                                                       |      |        |
|-------------|------------|---------|-------------------------------------------------------|------|--------|
| 171807_x_at | C02E7.7    |         |                                                       | 6.25 | 0.0041 |
| 176474_at   | Y54F10AM.6 |         |                                                       | 6.24 | 0.0037 |
| 188188_s_at | Y38F1A.3   | ptr-18  | PaTched Related family                                | 6.21 | 0.0016 |
| 178248_at   | C07E3.3    |         |                                                       | 6.21 | 0.0032 |
| 176327_s_at | Y47D7A.5   | grl-5   | GRound-Like (grd related)                             | 6.18 | 0.0027 |
| 188527_s_at | C42D8.5    | acn-1   | ACE(angiotensin converting enzyme)-like Non-peptidase | 6.15 | 0.0020 |
| 181715_s_at | T19B10.2   |         |                                                       | 6.12 | 0.0040 |
| 188365_at   | C39E9.3    | col-131 | COLlagen                                              | 6.11 | 0.0034 |
| 182386_s_at | Y37A1B.7   |         |                                                       | 6.09 | 0.0064 |
| 178508_at   | C14A4.9    |         |                                                       | 6.03 | 0.0027 |
| 192737_at   | F49E11.10  | scl-2   | SCP-Like extracellular protein                        | 5.97 | 0.0052 |
| 189419_at   | F15B9.6    |         | phospholipase A2                                      | 5.95 | 0.0033 |
| 175528_at   | C35E12.5   | sem-2   | SEx Muscle abnormal                                   | 5.89 | 0.0031 |
| 185835_at   | K08B12.1   |         |                                                       | 5.88 | 0.0037 |
| 183582_at   | C47E12.6   |         |                                                       | 5.81 | 0.0045 |

|             |           |         |                                              |      |        |
|-------------|-----------|---------|----------------------------------------------|------|--------|
| 179254_at   | F25H8.6   | bed-3   | Zinc finger protein (BED class)              | 5.79 | 0.0020 |
| 183363_at   | ZC513.1   |         |                                              | 5.79 | 0.0028 |
| 190570_at   | F52D1.1   |         | acid alpha-glucosidase                       | 5.78 | 0.0016 |
| 178652_at   | ZK84.1    |         |                                              | 5.77 | 0.0032 |
| 179830_at   | F01D5.10  |         |                                              | 5.77 | 0.0036 |
| 177643_at   | T26C5.2   |         |                                              | 5.76 | 0.0062 |
| 177870_at   | C02F4.4   |         |                                              | 5.75 | 0.0029 |
| 183120_at   | C06G1.1   |         |                                              | 5.73 | 0.0022 |
| 180624_s_at | F52D1.3   | pqn-40  | Prion-like-(Q/N-rich)-domain-bearing protein | 5.69 | 0.0025 |
| 191612_at   | F28D1.9   |         |                                              | 5.68 | 0.0025 |
| 176851_at   | Y40B10A.6 |         |                                              | 5.68 | 0.0044 |
| 177505_at   | T06G6.6   |         |                                              | 5.67 | 0.0041 |
| 190446_s_at | C31H2.2   | dpy-8   | DumPY : shorter than wild-type               | 5.64 | 0.0055 |
| 181714_at   | T19B10.2  |         |                                              | 5.58 | 0.0029 |
| 172803_x_at | C34H4.4   | col-107 | COLlagen                                     | 5.56 | 0.0032 |
| 192089_s_at | F13H8.5   |         | Phospholipase ADRAB-B (Rabbit)               | 5.53 | 0.0027 |

|             |           |        |                                |      |        |
|-------------|-----------|--------|--------------------------------|------|--------|
| 191180_at   | ZK1290.12 | wrt-1  | WaRThog (hedgehog-like family) | 5.52 | 0.0036 |
| 177024_at   | C29E4.1   | col-90 | COLlagen                       | 5.47 | 0.0017 |
| 173639_at   | C34E7.4   |        |                                | 5.44 | 0.0023 |
| 172744_at   | K11G9.6   | mtl-1  | MeTaLlothionein                | 5.43 | 0.0177 |
| 185412_at   | T22B11.2  |        |                                | 5.42 | 0.0029 |
| 174218_at   | F11E6.8   |        |                                | 5.41 | 0.0039 |
| 173664_at   | ZC13.4    | mab-7  | Male ABnormal                  | 5.33 | 0.0085 |
| 193958_at   | F44C4.3   | cpr-4  | Cysteine PRotease related      | 5.32 | 0.0032 |
| 185608_at   | H03E18.1  |        |                                | 5.27 | 0.0014 |
| 184788_at   | F49H12.5  |        |                                | 5.27 | 0.0062 |
| 181998_at   | F26B1.4   | col-58 | COLlagen                       | 5.26 | 0.0047 |
| 190307_s_at | ZK131.8   | his-14 | HIStone                        | 5.26 | 0.0068 |
| 190307_s_at | ZK131.1   | his-26 | HIStone                        | 5.26 | 0.0068 |
| 190307_s_at | ZK131.4   | his-10 | HIStone                        | 5.26 | 0.0068 |
| 172729_x_at | F11G11.12 | col-73 | COLlagen                       | 5.26 | 0.0015 |
| 175662_at   | M163.3    | his-24 | HIStone                        | 5.25 | 0.0055 |



|             |           |         |                                                    |      |        |
|-------------|-----------|---------|----------------------------------------------------|------|--------|
| 172685_x_at | K06C4.4   | his-20  | HIStone                                            | 5.25 | 0.0029 |
| 173579_s_at | W04G3.2   |         |                                                    | 5.24 | 0.0041 |
| 183381_at   | C50F7.5   |         |                                                    | 5.20 | 0.0115 |
| 183755_s_at | F46C8.8   |         |                                                    | 5.20 | 0.0034 |
| 188947_at   | T09F5.9   | clec-47 | C-type LECTin                                      | 5.18 | 0.0113 |
| 174657_s_at | F56H1.1   | che-14  | abnormal CHEmotaxis                                | 5.14 | 0.0043 |
| 184151_at   | F26A1.9   |         |                                                    | 5.13 | 0.0039 |
| 189278_s_at | T21D11.1  |         | zinc protease                                      | 5.12 | 0.0023 |
| 193344_at   | sym-1     |         | SYnthetic lethal with Mec                          | 5.11 | 0.0091 |
| 178068_s_at | C34E7.4   |         |                                                    | 5.09 | 0.0041 |
| 184662_at   | Y46G5A.29 |         |                                                    | 5.09 | 0.0044 |
| 180055_at   | ZC328.1   |         |                                                    | 5.06 | 0.0141 |
| 177059_at   | Y46C8AL.5 | clec-72 | C-type LECTin                                      | 5.03 | 0.0037 |
| 174235_at   | K02C4.4   | ltd-1   | Lim and Transglutaminase Domain                    | 5.02 | 0.0022 |
| 193091_at   | T02C1.1   |         | Zinc finger, C3HC4 type (RING finger)              | 5.02 | 0.0032 |
| 192607_at   | T07F10.4  | bus-19  | Bacterially Un-Swollen (M. nematophilum resistant) | 5.00 | 0.0019 |

|             |          |        |                                              |      |        |
|-------------|----------|--------|----------------------------------------------|------|--------|
| 174254_at   | M03F4.6  |        |                                              | 5.00 | 0.0251 |
| 184352_at   | C17H12.6 |        |                                              | 4.98 | 0.0117 |
| 190615_s_at | F13B12.4 |        | cysteine synthase like                       | 4.98 | 0.0030 |
| 183577_at   | ZK1067.7 | pqn-95 | Prion-like-(Q/N-rich)-domain-bearing protein | 4.91 | 0.0029 |
| 172824_x_at | T10C6.11 | his-4  | HIStone                                      | 4.89 | 0.0030 |
| 192786_s_at | B0286.3  |        | saicar synthetase/air carboxlyase            | 4.89 | 0.0030 |
| 191735_at   | T03D8.6  |        |                                              | 4.86 | 0.0023 |
| 188270_at   | T21H3.2  | ptr-16 | PaTched Related family                       | 4.85 | 0.0047 |
| 184993_at   | H02F09.3 |        |                                              | 4.84 | 0.0041 |
| 183438_s_at | F45E4.8  | nlp-20 | Neuropeptide-Like Protein                    | 4.80 | 0.0039 |
| 172196_x_at | K08C9.4  | col-65 | COLlagen                                     | 4.74 | 0.0033 |
| 188574_s_at | H17B01.2 | col-70 | COLlagen                                     | 4.73 | 0.0037 |
| 188574_s_at | Y51H7C.1 |        | COLlagen                                     | 4.73 | 0.0091 |
| 173919_s_at | C56A3.2  | ttr-44 | TransThyretin-Related family domain          | 4.73 | 0.0091 |
| 184746_at   | F52F10.2 |        |                                              | 4.68 | 0.0036 |
| 181027_at   | Y42A5A.2 | lact-8 | beta-LACTamase domain containing             | 4.63 | 0.0036 |

|             |          |         |                                   |      |        |
|-------------|----------|---------|-----------------------------------|------|--------|
| 189814_s_at | F41C6.5  | col-173 | COLlagen                          | 4.63 | 0.0030 |
| 172825_x_at | F45F2.2  | his-39  | HIStone                           | 4.62 | 0.0044 |
| 180122_at   | C25B8.3  | cpr-6   | Cysteine PRotease related         | 4.56 | 0.0043 |
| 179600_at   | C38C6.3  |         |                                   | 4.55 | 0.0025 |
| 192153_at   | M153.1   |         | pyrroline-5-carboxylate reductase | 4.52 | 0.0024 |
| 192148_at   | T07C5.1  | ugt-50  | UDP-GlucuronosylTransferase       | 4.52 | 0.0036 |
| 179249_at   | ZK617.2  | lips-6  | LIPaSe related                    | 4.52 | 0.0104 |
| 178343_s_at | F58G1.5  | lips-9  | LIPaSe related                    | 4.50 | 0.0030 |
| 179786_at   | C08E8.4  |         |                                   | 4.48 | 0.0109 |
| 189076_at   | T21B10.6 | cutl-15 | CUTiclin-Like                     | 4.48 | 0.0032 |
| 187424_s_at | C45G9.6  |         |                                   | 4.45 | 0.0058 |
| 192181_at   | T28H10.3 |         | vacuolar processing enzyme like   | 4.44 | 0.0170 |
| 192137_at   | C05C8.3  | fkf-3   | FK506-Binding protein family      | 4.44 | 0.0046 |
| 175272_at   | F45D3.2  |         |                                   | 4.43 | 0.0035 |
| 172874_x_at | F45F2.12 | his-8   | HIStone                           | 4.41 | 0.0034 |
| 183539_s_at | C06E7.4  |         |                                   | 4.39 | 0.0021 |

|             |           |         |                                                 |      |        |
|-------------|-----------|---------|-------------------------------------------------|------|--------|
| 180418_at   | T19D7.3   |         |                                                 | 4.39 | 0.0044 |
| 193623_at   | F21F3.3   |         | protein-S isoprenylsysteine O-methyltransferase | 4.38 | 0.0077 |
| 181552_at   | T22B7.3   |         |                                                 | 4.38 | 0.0031 |
| 183963_at   | C29F9.2   |         |                                                 | 4.38 | 0.0131 |
| 179176_at   | C52G5.2   |         |                                                 | 4.36 | 0.0029 |
| 182683_at   | ZC250.3   |         |                                                 | 4.36 | 0.0046 |
| 184682_s_at | K09B11.10 |         |                                                 | 4.34 | 0.0024 |
| 171956_s_at | ZK270.1   | ptr-23  | PaTched Related family                          | 4.34 | 0.0025 |
| 175294_s_at | T17H7.7   |         |                                                 | 4.34 | 0.0044 |
| 183103_at   | F25E5.2   |         |                                                 | 4.34 | 0.0024 |
| 189443_at   | T19B10.9  |         | max protein like                                | 4.33 | 0.0022 |
| 172475_x_at | B0222.7   | col-145 | COLlagen                                        | 4.32 | 0.0068 |
| 178930_at   | F19H8.2   |         |                                                 | 4.31 | 0.0072 |
| 182733_at   | C31A11.5  | oac-6   | O-ACyltransferase homolog                       | 4.30 | 0.0035 |
| 188475_at   | C44C10.1  | col-180 | COLlagen                                        | 4.29 | 0.0044 |
| 180979_at   | F41E6.2   | grd-5   | GRounDhog (hedgehog-like family)                | 4.25 | 0.0014 |

|             |           |         |                                                      |      |        |
|-------------|-----------|---------|------------------------------------------------------|------|--------|
| 193849_at   | F13D11.4  |         | dihydroflavonol-4-reductase (maize, petunia, tomato) | 4.25 | 0.0036 |
| 172618_x_at | F07B7.9   | his-50  | HIStone                                              | 4.25 | 0.0066 |
| 184093_at   | M01H9.1   |         |                                                      | 4.25 | 0.0084 |
| 186349_at   | Y51H7C.1  |         |                                                      | 4.24 | 0.0070 |
| 193147_at   | F01G10.10 |         | lipopolysaccharide-binding protein like              | 4.22 | 0.0099 |
| 179401_at   | ZK662.2   |         |                                                      | 4.21 | 0.0026 |
| 193024_at   | C15H9.1   | nnt-1   | Nicotinamide Nucleotide Transhydrogenase             | 4.20 | 0.0095 |
| 173928_at   | F45H11.6  |         |                                                      | 4.20 | 0.0107 |
| 185984_at   | F57C12.1  | nas-38  | Nematode AStacin protease                            | 4.18 | 0.0096 |
| 176743_s_at | F56D6.15  | clec-69 | C-type LECTin                                        | 4.18 | 0.0054 |
| 183624_at   | F55G11.5  | dod-22  | Downstream Of DAF-16 (regulated by DAF-16)           | 4.17 | 0.0060 |
| 188368_at   | ZK836.1   | lon-3   | LONg                                                 | 4.17 | 0.0023 |
| 188675_at   | C09G5.3   | col-79  | COLlagen                                             | 4.16 | 0.0107 |
| 180741_at   | F36H9.5   |         |                                                      | 4.14 | 0.0017 |
| 172650_x_at | K06C4.10  | his-18  | HIStone                                              | 4.12 | 0.0069 |
| 184091_at   | C26F1.5   | grl-10  | GRound-Like (grd related)                            | 4.12 | 0.0032 |

|             |           |        |                                              |      |        |
|-------------|-----------|--------|----------------------------------------------|------|--------|
| 191038_at   | C02F5.8   | tsp-1  | TetraSPanin family                           | 4.11 | 0.0046 |
| 189952_at   | R08B4.1   | grd-1  | GRoundHog (hedgehog-like family)             | 4.10 | 0.0083 |
| 184191_at   | R09B5.9   | cnc-4  | CaeNaCin (Caenorhabditis bacteriocin)        | 4.06 | 0.0163 |
| 180540_at   | C42D4.3   |        |                                              | 4.05 | 0.0104 |
| 190306_s_at | C29F3.2   | wrt-8  | WaRThog (hedgehog-like family)               | 4.04 | 0.0046 |
| 188116_at   | F57H12.3  | ora-1  | Onchocerca Related Antigen family            | 4.04 | 0.0117 |
| 175229_at   | C08F11.13 |        |                                              | 4.03 | 0.0070 |
| 182066_s_at | F59B10.1  | pqn-47 | Prion-like-(Q/N-rich)-domain-bearing protein | 4.02 | 0.0041 |
| 174410_at   | Y18H1A.9  |        |                                              | 4.01 | 0.0022 |
| 174957_s_at | F52F10.3  | oac-31 | O-ACyltransferase homolog                    | 3.97 | 0.0038 |
| 179069_at   | C08E8.4   |        |                                              | 3.97 | 0.0041 |
| 181713_s_at | M03F4.6   |        |                                              | 3.97 | 0.0041 |
| 180841_at   | C32H11.5  |        |                                              | 3.95 | 0.0137 |
| 191057_s_at | ZC455.4   | ugt-6  | UDP-GlucuronosylTransferase                  | 3.93 | 0.0099 |
| 172405_x_at | R09B5.8   | cnc-3  | CaeNaCin (Caenorhabditis bacteriocin)        | 3.93 | 0.0042 |
| 191805_s_at | F23H12.5  |        | Thrombospondin type 1 domain                 | 3.91 | 0.0121 |

|             |           |         |                                            |      |        |
|-------------|-----------|---------|--------------------------------------------|------|--------|
| 173417_at   | F35H10.10 |         |                                            | 3.90 | 0.0044 |
| 180192_at   | C49G7.5   |         |                                            | 3.90 | 0.0126 |
| 182812_at   | F22F4.1   |         |                                            | 3.89 | 0.0094 |
| 180960_at   | C13C12.2  |         |                                            | 3.88 | 0.0058 |
| 193656_s_at | C50F2.6   | fkf-5   | FK506-Binding protein family               | 3.87 | 0.0059 |
| 179239_at   | F53H4.3   |         |                                            | 3.86 | 0.0059 |
| 189600_at   | F17C8.2   | col-89  | COLlagen                                   | 3.83 | 0.0057 |
| 177724_at   | W04G3.1   |         |                                            | 3.82 | 0.0034 |
| 173335_s_at | C24B9.9   | dod-3   | Downstream Of DAF-16 (regulated by DAF-16) | 3.81 | 0.0345 |
| 183601_at   | C06E7.4   |         |                                            | 3.79 | 0.0040 |
| 194030_s_at | Y37D3B.10 | dpy-18  | DumPY : shorter than wild-type             | 3.79 | 0.0063 |
| 176672_at   | W08G11.1  |         |                                            | 3.78 | 0.0106 |
| 174623_at   | T27B1.2   | ztf-19  | Zinc finger Transcription Factor family    | 3.77 | 0.0059 |
| 178089_at   | K03B8.6   |         |                                            | 3.76 | 0.0043 |
| 183492_at   | Y39A1A.9  |         |                                            | 3.75 | 0.0044 |
| 181565_at   | F56D6.2   | clec-67 | C-type LECTin                              | 3.75 | 0.0038 |

|             |            |          |                                  |      |        |
|-------------|------------|----------|----------------------------------|------|--------|
| 190375_at   | F46B3.5    | grd-2    | GRoundhog (hedgehog-like family) | 3.74 | 0.0133 |
| 190303_s_at | Y66A7A.6   | gly-8    | GLYcosylation related            | 3.73 | 0.0020 |
| 185001_at   | C08F11.13  |          |                                  | 3.71 | 0.0050 |
| 187681_at   | T25D10.4   |          |                                  | 3.69 | 0.0062 |
| 173635_at   | F16F9.2    | dpy-6    | DumPY : shorter than wild-type   | 3.68 | 0.0027 |
| 174044_at   | K04H4.2    |          |                                  | 3.67 | 0.0132 |
| 179854_at   | Y47D3A.2   | fbxa-128 | F-box A protein                  | 3.66 | 0.0068 |
| 176025_at   | D2007.1    |          |                                  | 3.64 | 0.0086 |
| 172764_x_at | F45F2.4    | his-7    | HIStone                          | 3.63 | 0.0056 |
| 174508_s_at | K08E7.5    |          |                                  | 3.63 | 0.0035 |
| 191698_at   | C40H1.4    | elo-4    | fatty acid ELONGation            | 3.63 | 0.0046 |
| 183639_at   | F13A7.11   |          |                                  | 3.62 | 0.0047 |
| 174781_at   | T27A10.6   |          |                                  | 3.62 | 0.0029 |
| 189723_s_at | EGAP7.1    | dpy-3    | DumPY : shorter than wild-type   | 3.61 | 0.0047 |
| 176330_at   | Y22D7AL.14 |          |                                  | 3.61 | 0.0082 |
| 191887_s_at | W07B8.5    | cpr-5    | Cysteine PRotease related        | 3.60 | 0.0016 |



|             |           |        |                                |      |        |
|-------------|-----------|--------|--------------------------------|------|--------|
| 175803_at   | Y47D3B.10 | dpy-18 | DumPY : shorter than wild-type | 3.59 | 0.0056 |
| 183911_at   | T19A5.3   |        |                                | 3.59 | 0.0056 |
| 188441_at   | F21F8.4   |        | protease                       | 3.59 | 0.0078 |
| 184629_at   | Y74E4A.1  | lgc-27 | Ligand-Gated ion Channel       | 3.57 | 0.0052 |
| 173947_at   | F13H8.5   |        | Phospholipase ADRAB-B (Rabbit) | 3.57 | 0.0144 |
| 182403_at   | ZK418.7   |        |                                | 3.55 | 0.0073 |
| 179610_s_at | T16G1.5   |        |                                | 3.55 | 0.0133 |
| 185003_s_at | F52F10.3  | oac-31 | O-ACyltransferase homolog      | 3.53 | 0.0027 |
| 176407_at   | F28A10.1  |        | hypothetical protein           | 3.53 | 0.0114 |
| 173252_s_at | T19C4.7   | nlp-33 | Neuropeptide-Like Protein      | 3.53 | 0.0070 |
| 177581_at   | F45G2.5   | bli-5  | BLIstered cuticle              | 3.52 | 0.0041 |
| 180612_s_at | F53A9.8   |        |                                | 3.51 | 0.0080 |
| 172055_x_at | ZK131.6   | his-12 | HIStone                        | 3.50 | 0.0051 |
| 172055_x_at | ZK131.10  | his-16 | HIStone                        | 3.50 | 0.0051 |
| 172055_x_at | K06C4.11  | his-19 | HIStone                        | 3.50 | 0.0051 |
| 172055_x_at | K06C4.3   | his-21 | HIStone                        | 3.50 | 0.0051 |

|             |           |        |         |      |        |
|-------------|-----------|--------|---------|------|--------|
| 172055_x_at | K06C4.12  | his-22 | HIStone | 3.50 | 0.0051 |
| 172055_x_at | F35H10.11 | his-29 | HIStone | 3.50 | 0.0051 |
| 172055_x_at | T10C6.12  | his-3  | HIStone | 3.50 | 0.0051 |
| 172055_x_at | F35H10.1  | his-30 | HIStone | 3.50 | 0.0051 |
| 172055_x_at | F17E9.13  | his-33 | HIStone | 3.50 | 0.0051 |
| 172055_x_at | F17E9.9   | his-34 | HIStone | 3.50 | 0.0051 |
| 172055_x_at | F08G2.2   | his-43 | HIStone | 3.50 | 0.0051 |
| 172055_x_at | F07B7.10  | his-51 | HIStone | 3.50 | 0.0051 |
| 172055_x_at | F07B7.4   | his-52 | HIStone | 3.50 | 0.0051 |
| 172055_x_at | F07B7.3   | his-53 | HIStone | 3.50 | 0.0051 |
| 172055_x_at | F07B7.11  | his-54 | HIStone | 3.50 | 0.0051 |
| 172055_x_at | F54E12.5  | his-57 | HIStone | 3.50 | 0.0051 |
| 172055_x_at | H02I12.7  | his-65 | HIStone | 3.50 | 0.0051 |
| 172055_x_at | K06C4.2   | his-28 | HIStone | 3.50 | 0.0051 |
| 172055_x_at | F45F2.3   | his-5  | HIStone | 3.50 | 0.0051 |
| 172055_x_at | F45F2.4   | his-7  | HIStone | 3.50 | 0.0051 |

|             |           |          |                                                       |      |        |
|-------------|-----------|----------|-------------------------------------------------------|------|--------|
| 191850_s_at | K08C7.2   | fmo-1    | Flavin-containing MonoOxygenase family                | 3.50 | 0.0129 |
| 193464_s_at | F35G2.4   | phy-2    | Proline HYdroxylase                                   | 3.49 | 0.0040 |
| 181912_at   | F58H10.1  |          |                                                       | 3.48 | 0.0028 |
| 193303_at   | C06E8.5   |          | bacterial permeability-increasing protein             | 3.48 | 0.0033 |
| 178244_at   | F01D5.6   |          |                                                       | 3.47 | 0.0106 |
| 186604_s_at | Y38C1AB.1 |          |                                                       | 3.46 | 0.0041 |
| 186604_s_at | Y38C1AB.5 |          |                                                       | 3.46 | 0.0041 |
| 190048_s_at | F32B5.8   | cpz-1    | CathePsin Z                                           | 3.45 | 0.0020 |
| 192146_s_at | F46BC8.6  | dpy-7    | DumPY : shorter than wild-type                        | 3.44 | 0.0125 |
| 172363_x_at | F53A9.6   |          |                                                       | 3.44 | 0.0132 |
| 178236_s_at | F58B3.1   | lys-4    | LYSozyme                                              | 3.43 | 0.0069 |
| 190166_at   | T01B11.4  | ant-1.44 | Adenine Nucleotide Translocator                       | 3.42 | 0.0081 |
| 192280_s_at | ZK131.5   | his-11   | HIStone                                               | 3.42 | 0.0089 |
| 192280_s_at | ZK131.9   | his-15   | HIStone                                               | 3.42 | 0.0089 |
| 192280_s_at | F08G2.1   | his-44   | HIStone                                               | 3.42 | 0.0089 |
| 193893_at   | ZK909.3   |          | guanosine-3',5'-bis(diphosphate)-pyrophosphohydrolase | 3.41 | 0.0038 |

|             |          |         |                                                          |      |        |
|-------------|----------|---------|----------------------------------------------------------|------|--------|
|             |          |         | like                                                     |      |        |
| 181051_at   | T19D7.6  |         | hypothetical protein                                     | 3.41 | 0.0104 |
| 172888_x_at | C40D2.2  | math-20 | MATH (meprin-associated Traf homology) domain containing | 3.41 | 0.0074 |
| 182051_s_at | B0454.7  | clec-2  | C-type LECTin                                            | 3.41 | 0.0149 |
| 182051_s_at | C41H7.7  | clec-3  | C-type LECTin                                            | 3.41 | 0.0149 |
| 182510_at   | T07G12.3 |         |                                                          | 3.41 | 0.0036 |
| 189921_at   | C05C10.4 |         |                                                          | 3.40 | 0.0029 |
| 172991_at   | C45B2.7  | ptr-4   | PaTched Related family                                   | 3.40 | 0.0047 |
| 173558_at   | ZC443.3  |         |                                                          | 3.36 | 0.0103 |
| 191527_s_at | C07A9.8  |         | Putative membrane protein                                | 3.36 | 0.0184 |
| 190551_at   | W01A8.6  |         | carboxypeptidase b like                                  | 3.36 | 0.0071 |
| 180840_at   | C55F2.2  | ilys-4  | Invertebrate LYSozyme                                    | 3.35 | 0.0095 |
| 183689_at   | C54F6.3  |         |                                                          | 3.34 | 0.0036 |
| 178432_s_at | ZC443.3  |         |                                                          | 3.34 | 0.0127 |
| 179896_at   | F47F6.1  | lin-42  | abnormal cell LINeage                                    | 3.33 | 0.0158 |

|             |            |         |                                          |      |        |
|-------------|------------|---------|------------------------------------------|------|--------|
| 179861_at   | Y47D3B.1   |         |                                          | 3.33 | 0.0043 |
| 184855_at   | T23B12.8   |         |                                          | 3.33 | 0.0066 |
| 179046_at   | F46A9.1    |         |                                          | 3.33 | 0.0114 |
| 176163_at   | Y119C1B.9  |         |                                          | 3.31 | 0.0047 |
| 192685_at   | Y45F10D.13 | tag-208 | Temporarily Assigned Gene name           | 3.31 | 0.0019 |
| 188294_at   | F32G8.5    | col-152 | COLlagen                                 | 3.31 | 0.0117 |
| 184558_at   | Y45F10A.5  | nlp-17  | Neuropeptide-Like Protein                | 3.31 | 0.0051 |
| 193872_s_at | F29D11.1   | lrp-1   | Low-density lipoprotein Receptor Related | 3.30 | 0.0034 |
| 184400_at   | F22H10.2   |         |                                          | 3.30 | 0.0115 |
| 186950_at   | C05B5.8    |         |                                          | 3.30 | 0.0022 |
| 181428_at   | F13B6.1    |         |                                          | 3.29 | 0.0075 |
| 179164_at   | C06G8.1    |         |                                          | 3.29 | 0.0064 |
| 187228_at   | R07G3.6    |         |                                          | 3.28 | 0.0056 |
| 174056_at   | F54D1.6    |         |                                          | 3.28 | 0.0062 |
| 176256_s_at | Y58A7A.4   |         |                                          | 3.26 | 0.0062 |
| 183089_at   | C15C7.5    |         |                                          | 3.26 | 0.0034 |

|             |            |          |                                    |      |        |
|-------------|------------|----------|------------------------------------|------|--------|
| 188104_s_at | F25H8.5    | dur-1    | Dauer Up-Regulated                 | 3.26 | 0.0025 |
| 192924_s_at | K11C4.4    | odc-1    | Ornithine DeCarboxylase            | 3.25 | 0.0122 |
| 179139_at   | T05D4.4    | osm-7    | OSMotic avoidance abnormal         | 3.24 | 0.0043 |
| 180766_at   | F13B6.3    |          |                                    | 3.24 | 0.0141 |
| 194068_s_at | T23G11.6   |          |                                    | 3.24 | 0.0035 |
| 176212_at   | ZC47.7     | fbxa-151 | F-box A protein                    | 3.24 | 0.0130 |
| 176212_at   | Y119D3B.19 | fbxa-78  | F-box A protein                    | 3.24 | 0.0130 |
| 178935_at   | F07D3.3    |          |                                    | 3.24 | 0.0059 |
| 188410_at   | T23F4.4    | nas-27   | Nematode AStacin protease          | 3.24 | 0.0046 |
| 189705_s_at | M88.6      | pan-1    | P-granule Associated Novel protein | 3.23 | 0.0054 |
| 193677_at   | F32D8.7    |          |                                    | 3.22 | 0.0076 |
| 184711_at   | C49G7.10   |          |                                    | 3.21 | 0.0167 |
| 189679_at   | F21A3.3    |          | EGF-domain protein                 | 3.20 | 0.0030 |
| 174281_at   | Y77E11A.14 |          |                                    | 3.20 | 0.0070 |
| 176044_at   | Y41D4B.16  |          |                                    | 3.19 | 0.0049 |
| 185474_at   | T05B11.1   |          |                                    | 3.17 | 0.0106 |

|             |           |         |                                                |      |        |
|-------------|-----------|---------|------------------------------------------------|------|--------|
| 182428_s_at | Y22F5A.6  | lys-3   | LYSozyme                                       | 3.17 | 0.0107 |
| 179858_at   | C49C8.5   |         |                                                | 3.17 | 0.0074 |
| 193127_s_at | K07E3.3   | dao-3   | Dauer or Aging adult Overexpression            | 3.17 | 0.0044 |
| 186676_s_at | F35H10.10 |         |                                                | 3.16 | 0.0014 |
| 187462_at   | ZK1307.1  |         |                                                | 3.16 | 0.0051 |
| 179199_at   | T09F5.1   |         |                                                | 3.15 | 0.0030 |
| 184240_at   | F53F10.1  |         |                                                | 3.14 | 0.0048 |
| 174995_s_at | C54A12.1  | ptr-6   | PaTched Related family                         | 3.14 | 0.0031 |
| 178449_at   | C53B4.8   |         |                                                | 3.14 | 0.0208 |
| 177193_s_at | AC3.3     | abu-1   | Activated in Blocked Unfolded protein response | 3.13 | 0.0146 |
| 177193_s_at | AC3.4     | pqn-2   | Prion-like-(Q/N-rich)-domain-bearing protein   | 3.13 | 0.0146 |
| 173727_s_at | F40F4.6   |         | EGF-like repeats                               | 3.13 | 0.0021 |
| 194252_x_at | F38A3.2   | ram-2   | abnormal RAY Morphology                        | 3.13 | 0.0056 |
| 185399_at   | Y75B8A.28 |         |                                                | 3.12 | 0.0046 |
| 187033_at   | F54D1.6   |         |                                                | 3.11 | 0.0046 |
| 176016_at   | M02H5.5   | nhr-203 | Nuclear Hormone Receptor family                | 3.11 | 0.0042 |

|             |           |       |                                           |      |        |
|-------------|-----------|-------|-------------------------------------------|------|--------|
| 182019_at   | W03D2.9   |       |                                           | 3.10 | 0.0044 |
| 185357_at   | Y37D8A.16 |       |                                           | 3.09 | 0.0081 |
| 184205_at   | Y52B11B.1 |       |                                           | 3.08 | 0.0037 |
| 175254_at   | C05D10.3  | wht-1 | WHiTe (Drosophila) related ABC transporte | 3.08 | 0.0049 |
| 174347_s_at | C49C8.5   |       |                                           | 3.08 | 0.0047 |
| 174252_at   | ZK783.1   | fbn-1 | FiBrilliN homolog                         | 3.07 | 0.0054 |
| 174314_at   | F41C6.1   | unc-6 | UNCoordinated                             | 3.07 | 0.0035 |
| 190937_s_at | C49A1.3   |       | Putative membrane protein                 | 3.06 | 0.0069 |
| 190688_s_at | F44E7.2   |       | nitrophenylphosphatase                    | 3.06 | 0.0459 |
| 190688_s_at | K09H11.7  |       | nitrophenylphosphatase                    | 3.06 | 0.0459 |
| 190688_s_at | C53A3.2   |       | nitrophenylphosphatase                    | 3.06 | 0.0459 |
| 177555_at   | F09B9.4   |       |                                           | 3.06 | 0.0057 |
| 183009_at   | Y38F1A.8  |       |                                           | 3.06 | 0.0102 |
| 178654_s_at | W04A8.4   |       |                                           | 3.06 | 0.0122 |
| 183630_at   | C29F9.3   |       |                                           | 3.05 | 0.0106 |
| 188927_at   | C02F5.11  | tsp-2 | TetraSPanin family                        | 3.05 | 0.0057 |



|             |            |          |                                                          |      |        |
|-------------|------------|----------|----------------------------------------------------------|------|--------|
| 175156_at   | F37A8.5    |          | Predicted Yippee-type zinc-binding protein               | 3.05 | 0.0323 |
| 190370_at   | F13G3.1    | ztf-2    | Zinc finger Transcription Factor family                  | 3.04 | 0.0054 |
| 186012_s_at | F57H12.6   |          |                                                          | 3.04 | 0.0171 |
| 187318_at   | F48E8.1    | lon-1    | LONg                                                     | 3.04 | 0.0231 |
| 177378_at   | R52.8      | math-36  | MATH (meprin-associated Traf homology) domain containing | 3.03 | 0.0186 |
| 172360_x_at | C03A7.4    | pqn-5    | Prion-like-(Q/N-rich)-domain-bearing protein             | 3.03 | 0.0141 |
| 175060_at   | F52F10.2   |          |                                                          | 3.03 | 0.0022 |
| 192106_at   | C34C6.3    |          | EGF receptor/notch-like protein                          | 3.02 | 0.0074 |
| 172902_x_at | F36A4.10   | col-34   | COLlagen                                                 | 3.02 | 0.0067 |
| 185390_at   | F49D11.6   |          |                                                          | 3.02 | 0.0126 |
| 180978_at   | M03F4.6    |          |                                                          | 3.02 | 0.0038 |
| 182323_at   | C02H6.2    | fbxa-105 | F-box A protein                                          | 3.02 | 0.0088 |
| 172627_x_at | Y105C5A.12 |          |                                                          | 3.02 | 0.0027 |
| 172627_x_at | Y105C5A.13 |          |                                                          | 3.02 | 0.0027 |
| 184159_at   | T05E12.6   |          |                                                          | 3.01 | 0.0148 |

|             |           |         |                                            |      |        |
|-------------|-----------|---------|--------------------------------------------|------|--------|
| 172214_x_at | ZK525.1   | flp-15  | FMRF-Like Peptide                          | 3.00 | 0.0035 |
| 183802_at   | T05E7.4   |         |                                            | 3.00 | 0.0035 |
| 185238_at   | Y67A10A.8 |         |                                            | 2.99 | 0.0078 |
| 174388_at   | F47B7.2   |         |                                            | 2.99 | 0.0043 |
| 181121_at   | C46F2.1   |         |                                            | 2.99 | 0.0043 |
| 181793_at   | C09E8.3   | mlt-10  | MoLTing defective                          | 2.99 | 0.0030 |
| 184295_at   | Y37H2A.14 |         |                                            | 2.98 | 0.0126 |
| 191984_at   | R06B10.1  |         | protein-tyrosine phosphatase               | 2.98 | 0.0059 |
| 193268_at   | Y1A5A.1   |         | LIM domain containing proteins (2 domains) | 2.98 | 0.0133 |
| 190139_s_at | E03H4.10  | clec-17 | C-type LECTin                              | 2.97 | 0.0468 |
| 174132_at   | C38H2.2   |         |                                            | 2.97 | 0.0046 |
| 178723_at   | F54D5.3   |         |                                            | 2.97 | 0.0032 |
| 187503_at   | C14B9.3   |         |                                            | 2.97 | 0.0100 |
| 184116_s_at | T05E12.6  |         |                                            | 2.96 | 0.0085 |
| 182346_at   | ZC123.1   |         |                                            | 2.96 | 0.0040 |
| 184853_at   | C18A11.1  |         |                                            | 2.96 | 0.0343 |

|             |          |          |                                 |      |        |
|-------------|----------|----------|---------------------------------|------|--------|
| 191502_at   | ZC443.5  | ugt-18   | UDP-GlucuronosylTransferase     | 2.96 | 0.0119 |
| 184912_s_at | W04H10.4 | clec-118 | C-type LECTin                   | 2.96 | 0.0057 |
| 184912_s_at | T27D12.3 | clec-144 | C-type LECTin                   | 2.96 | 0.0057 |
| 193761_at   | F44C4.5  | ppt-1    | Palmitoyl Protein Thioesterase  | 2.96 | 0.0164 |
| 176818_s_at | C02F12.7 | tag-278  | Temporarily Assigned Gene name  | 2.95 | 0.0034 |
| 184811_at   | T27A10.6 |          |                                 | 2.95 | 0.0074 |
| 188632_at   | K08E3.1  | tyr-2    | TYRosinase                      | 2.95 | 0.0115 |
| 175382_at   | Y39A1A.9 |          |                                 | 2.94 | 0.0087 |
| 173839_at   | K02G10.5 |          | zinc-finger DNA-binding protein | 2.93 | 0.0056 |
| 171945_x_at | C09E8.3  | mlt-10   | MoLTing defective               | 2.93 | 0.0042 |
| 189452_at   | F46C8.2  | col-174  | COLlagen                        | 2.93 | 0.0072 |
| 187509_at   | B0280.7  |          |                                 | 2.93 | 0.0062 |
| 183555_at   | C34H4.3  | tag-244  | Temporarily Assigned Gene name  | 2.93 | 0.0041 |
| 187920_at   | F46G10.7 | sir-2.2  | yeast SIR related               | 2.93 | 0.0045 |
| 175193_at   | T25F10.3 |          |                                 | 2.93 | 0.0034 |
| 174404_s_at | F14E5.5  | lips-10  | LIPaSe related                  | 2.92 | 0.0147 |

|             |           |          |                                                           |      |        |
|-------------|-----------|----------|-----------------------------------------------------------|------|--------|
| 187972_at   | C03C11.2  | fog-3    | Feminization Of Germline                                  | 2.92 | 0.0071 |
| 189261_at   | F21A3.2   |          |                                                           | 2.92 | 0.0211 |
| 189346_at   | F48F7.2   | syn-2    | SYNtaxin                                                  | 2.92 | 0.0121 |
| 189344_s_at | F08F3.7   | cyp-14A5 | CYtochrome P450 family                                    | 2.91 | 0.0054 |
| 185780_at   | Y50E8A.16 | haf-7    | HAIF transporter (PGP related)                            | 2.90 | 0.0050 |
| 191020_at   | T18D3.3   |          | cobalt uptake like protein                                | 2.90 | 0.0168 |
| 188525_at   | F42G9.2   | cyn-6    | CYclophyliN                                               | 2.89 | 0.0043 |
| 177917_at   | C02D4.1   | jud-4    | JUDang (Korean for resistant to alcohol)                  | 2.89 | 0.0056 |
| 181441_s_at | T01D1.3   |          |                                                           | 2.89 | 0.0033 |
| 193885_at   | B0393.5   |          | EGF-like aspartic acid and asparagine hydroxylation sites | 2.89 | 0.0039 |
| 177997_at   | F11F1.6   |          |                                                           | 2.89 | 0.0084 |
| 175576_s_at | Y75B7AR.1 |          |                                                           | 2.88 | 0.0077 |
| 178038_at   | T23F6.1   |          |                                                           | 2.88 | 0.0065 |
| 176141_s_at | Y58A7A.3  |          |                                                           | 2.88 | 0.0107 |
| 188085_s_at | R09H10.4  | ptr-14   | PaTched Related family                                    | 2.87 | 0.0038 |

|             |            |         |                                       |      |        |
|-------------|------------|---------|---------------------------------------|------|--------|
| 189864_s_at | F19C7.7    | col-110 | COLlagen                              | 2.87 | 0.0113 |
| 189259_s_at | T02D1.5    | pmp-4   | Peroxisomal Membrane Protein related  | 2.87 | 0.0061 |
| 188390_at   | F56C11.2   | ptr-11  | PaTched Related family                | 2.86 | 0.0025 |
| 184534_s_at | C17H12.8   |         |                                       | 2.86 | 0.0082 |
| 183876_at   | C07G3.2    |         |                                       | 2.86 | 0.0352 |
| 179537_at   | C50B8.4    |         |                                       | 2.86 | 0.0181 |
| 190184_at   | ZK822.3    | nhx-9   | Na/H eXchanger                        | 2.85 | 0.0056 |
| 176188_at   | Y71D11A.1  | cdh-12  | CaDHerin family                       | 2.85 | 0.0099 |
| 187353_s_at | Y110A2AL.8 | ptc-3   | PaTChed family                        | 2.85 | 0.0025 |
| 177317_at   | VC5.3      | npa-1   | Nematode Polyprotein Allergen related | 2.84 | 0.0034 |
| 178149_s_at | T07C4.4    | spp-1   | SaPosin-like Protein family           | 2.83 | 0.0068 |
| 177519_at   | F35E2.9    |         |                                       | 2.83 | 0.0165 |
| 185492_at   | K02E10.4   |         |                                       | 2.83 | 0.0117 |
| 181310_at   | Y38H6C.9   |         |                                       | 2.83 | 0.0080 |
| 176209_at   | Y58A7A.5   |         |                                       | 2.82 | 0.0125 |
| 174283_s_at | F38B6.4    |         | GARS/AIRS/GART                        | 2.82 | 0.0024 |

|             |          |        |                                     |      |        |
|-------------|----------|--------|-------------------------------------|------|--------|
| 179373_at   | C50F4.9  |        |                                     | 2.82 | 0.0143 |
| 178194_at   | R07E3.6  |        |                                     | 2.82 | 0.0157 |
| 178409_s_at | F58B3.3  | lys-6  | LYSozyme                            | 2.81 | 0.0187 |
| 181888_at   | T05C1.3  |        |                                     | 2.81 | 0.0048 |
| 175025_at   | T14B4.7  | dpy-10 | DumPY : shorter than wild-type      | 2.80 | 0.0165 |
| 192930_s_at | ZC455.10 | fkf-4  | FK506-Binding protein family        | 2.79 | 0.0110 |
| 176686_at   | D1014.7  |        |                                     | 2.78 | 0.0057 |
| 179226_at   | C06B3.7  |        |                                     | 2.77 | 0.0256 |
| 181933_at   | T27A3.5  |        |                                     | 2.77 | 0.0117 |
| 181835_at   | F55G11.7 |        |                                     | 2.77 | 0.0271 |
| 178767_at   | C10C5.2  |        |                                     | 2.77 | 0.0142 |
| 178724_s_at | F54D5.3  |        |                                     | 2.77 | 0.0067 |
| 193545_s_at | F57B7.4  | mig-17 | abnormal cell MIGration             | 2.77 | 0.0068 |
| 193293_at   | C52E4.1  | cpr-1  | Cysteine PRotase related            | 2.77 | 0.0029 |
| 191066_s_at | ZC455.6  | ugt-5  | UDP-GlucuronosylTransferase         | 2.76 | 0.0069 |
| 190830_at   | T21C9.8  | ttr-23 | TransThyretin-Related family domain | 2.76 | 0.0122 |

|             |          |         |                                                                  |      |        |
|-------------|----------|---------|------------------------------------------------------------------|------|--------|
| 189736_s_at | K11D12.4 | cpt-4   | Carnitine Palmitoyl Transferase                                  | 2.76 | 0.0023 |
| 177255_at   | M195.2   |         |                                                                  | 2.76 | 0.0089 |
| 173210_s_at | F14B8.5  |         |                                                                  | 2.75 | 0.0017 |
| 186061_at   | R107.1   | nac-2   | NADC (Na <sup>+</sup> -coupled dicarboxylate transporter) family | 2.75 | 0.0038 |
| 181014_at   | C39H7.4  |         |                                                                  | 2.75 | 0.0063 |
| 184451_at   | Y57G7A.1 |         |                                                                  | 2.75 | 0.0216 |
| 185406_at   | Y95B8A.2 |         |                                                                  | 2.75 | 0.0184 |
| 175707_s_at | F15C11.1 | sem-4   | SEx Muscle abnormal                                              | 2.75 | 0.0044 |
| 178087_s_at | F58B3.2  | lys-5   | LYSozyme /// LYSozyme                                            | 2.74 | 0.0024 |
| 194056_s_at | F35C11.1 | clec-62 | C-type LECTin                                                    | 2.74 | 0.0051 |
| 179947_at   | T02C5.1  |         |                                                                  | 2.73 | 0.0061 |
| 190075_at   | K09C8.1  | pbo-4   | PBOc defective (defecation)                                      | 2.72 | 0.0021 |
| 182755_at   | F47F6.3  | oac-30  | O-ACyltransferase homolog                                        | 2.72 | 0.0031 |
| 178853_at   | F30F8.5  |         |                                                                  | 2.72 | 0.0078 |
| 180846_at   | C27D9.2  |         |                                                                  | 2.72 | 0.0071 |
| 190585_at   | ZK970.7  |         | OV-17 antigen precursor                                          | 2.72 | 0.0047 |

|             |           |        |                                   |      |        |
|-------------|-----------|--------|-----------------------------------|------|--------|
| 173778_s_at | C01B10.10 |        |                                   | 2.71 | 0.0160 |
| 180315_at   | F44G3.10  |        |                                   | 2.71 | 0.0478 |
| 180453_at   | F53A9.1   |        |                                   | 2.71 | 0.0096 |
| 193133_s_at | ZK337.1   |        |                                   | 2.71 | 0.0048 |
| 189455_at   | C27A2.4   |        |                                   | 2.70 | 0.0066 |
| 173583_s_at | C14H10.2  |        |                                   | 2.70 | 0.0035 |
| 174952_s_at | ZK337.1   |        |                                   | 2.70 | 0.0058 |
| 193263_at   | ZC410.4   | twk-8  | TWiK family of potassium channels | 2.70 | 0.0014 |
| 172386_x_at | B0213.5   | nlp-30 | Neuropeptide-Like Protein         | 2.70 | 0.0065 |
| 184787_at   | F46G11.2  |        |                                   | 2.70 | 0.0147 |
| 173238_s_at | K11D12.4  | cpt-4  | Carnitine Palmitoyl Transferase   | 2.69 | 0.0042 |
| 175797_at   | R31.1     | sma-1  | SMAll                             | 2.69 | 0.0074 |
| 173388_s_at | F09B12.3  |        |                                   | 2.69 | 0.0051 |
| 180611_at   | Y38H8A.1  |        |                                   | 2.69 | 0.0087 |
| 185334_s_at | R02F11.1  |        |                                   | 2.69 | 0.0051 |
| 176271_at   | C52D10.1  |        |                                   | 2.69 | 0.0034 |



|             |            |          |                                                |      |        |
|-------------|------------|----------|------------------------------------------------|------|--------|
| 178412_at   | R02D5.3    |          |                                                | 2.68 | 0.0097 |
| 184533_at   | C17H12.8   |          |                                                | 2.68 | 0.0026 |
| 180814_s_at | F09B12.3   |          |                                                | 2.67 | 0.0032 |
| 183735_at   | K03H9.3    |          |                                                | 2.67 | 0.0063 |
| 176227_s_at | Y71H2AM.15 |          |                                                | 2.67 | 0.0041 |
| 182253_at   | Y80D3A.5   | cyp-42A1 | CYtochrome P450 family                         | 2.67 | 0.0132 |
| 173395_s_at | Y47D3B.10  | dpy-18   | DumPY : shorter than wild-type                 | 2.67 | 0.0051 |
| 187377_at   | F37A4.5    |          |                                                | 2.66 | 0.0064 |
| 177298_at   | M163.1     |          |                                                | 2.66 | 0.0259 |
| 176819_s_at | Y49C4A.8   | ugt-29   | UDP-GlucuronosylTransferase                    | 2.66 | 0.0098 |
| 182143_s_at | F42C5.7    | grl-4    | GRound-Like (grd related)                      | 2.65 | 0.0075 |
| 190013_at   | T21D12.2   | dpy-9    | DumPY : shorter than wild-type                 | 2.65 | 0.0079 |
| 179860_at   | K04C2.5    |          |                                                | 2.65 | 0.0058 |
| 190541_at   | C30G12.2   |          | Alcohol dehydrogenase                          | 2.65 | 0.0101 |
| 194211_x_at | C03A7.14   | abu-8    | Activated in Blocked Unfolded protein response | 2.65 | 0.0178 |

|             |           |         |                                              |      |        |
|-------------|-----------|---------|----------------------------------------------|------|--------|
| 188061_s_at | F52E4.6   | wrt-2   | WaRThog (hedgehog-like family)               | 2.64 | 0.0067 |
| 189803_at   | F38B6.5   | col-172 | COLlagen                                     | 2.63 | 0.0040 |
| 187829_s_at | F55C12.7  | tag-234 | Temporarily Assigned Gene name               | 2.63 | 0.0230 |
| 177832_at   | K02E2.8   |         |                                              | 2.63 | 0.0259 |
| 180607_at   | C10G6.1   |         |                                              | 2.63 | 0.0029 |
| 174610_at   | F39C12.3  | tsp-14  | TetraSPanin family                           | 2.63 | 0.0041 |
| 175256_at   | C05E11.3  |         |                                              | 2.63 | 0.0067 |
| 173974_s_at | Y73B6BR.1 | pqn-89  | Prion-like-(Q/N-rich)-domain-bearing protein | 2.63 | 0.0082 |
| 184283_at   | Y51H4A.25 |         |                                              | 2.62 | 0.0135 |
| 174547_at   | F19H8.4   |         |                                              | 2.62 | 0.0071 |
| 190702_at   | K01H12.2  | ant-1.3 | Adenine Nucleotide Translocator              | 2.62 | 0.0085 |
| 190009_at   | F49E12.10 |         | ERG-3 like protein                           | 2.62 | 0.0080 |
| 172809_x_at | Y41E3.2   | dpy-4   | DumPY : shorter than wild-type               | 2.62 | 0.0041 |
| 172343_x_at | B0213.6   | nlp-31  | Neuropeptide-Like Protein                    | 2.61 | 0.0128 |
| 176002_at   | M02H5.8   |         |                                              | 2.60 | 0.0106 |
| 187775_at   | F40B5.3   |         |                                              | 2.60 | 0.0082 |

|             |           |          |                                     |      |        |
|-------------|-----------|----------|-------------------------------------|------|--------|
| 174273_at   | F01G10.9  |          |                                     | 2.60 | 0.0071 |
| 192458_at   | F27C8.1   | aat-1    | Amino Acid Transporter              | 2.60 | 0.0044 |
| 183631_at   | C08F11.5  | fbxa-98  | F-box A protein                     | 2.60 | 0.0081 |
| 190366_at   | F44F4.11  | tba-4    | TuBulin, Alpha                      | 2.60 | 0.0039 |
| 189983_at   | B0365.5   | clec-225 | C-type LECTin                       | 2.59 | 0.0260 |
| 178077_at   | F57F5.3   |          |                                     | 2.59 | 0.0086 |
| 177877_at   | F35E2.5   |          |                                     | 2.58 | 0.0050 |
| 188132_at   | M110.1    | col-76   | COLlagen                            | 2.58 | 0.0038 |
| 186715_at   | F46C5.2   |          |                                     | 2.58 | 0.0025 |
| 188653_at   | C44F1.2   | attf-1   | AT hook Transcription Factor family | 2.58 | 0.0228 |
| 186995_at   | Y65B4BR.2 | lpr-1    | LiPocalin-Related protein           | 2.58 | 0.0076 |
| 175546_at   | R06C1.6   |          |                                     | 2.58 | 0.0061 |
| 180204_at   | F35E12.9  |          |                                     | 2.58 | 0.0132 |
| 185640_s_at | F43B10.2  | tag-343  | Temporarily Assigned Gene name      | 2.58 | 0.0109 |
| 183859_at   | F13H10.1  |          |                                     | 2.58 | 0.0099 |
| 191861_at   | Y32F6B.3  | crp-1    | Cdc-42 Related Protein              | 2.57 | 0.0104 |

|             |           |        |                                                                    |      |        |
|-------------|-----------|--------|--------------------------------------------------------------------|------|--------|
| 185158_s_at | C33C12.4  |        |                                                                    | 2.57 | 0.0238 |
| 175438_at   | C36E8.2   | glb-11 | GLoBin                                                             | 2.57 | 0.0082 |
| 194109_s_at | Y75B12B.6 | plc-2  | PhosphoLipase C                                                    | 2.57 | 0.0171 |
| 193318_at   | C29F3.6   | srx-58 | Serpentine Receptor, class X                                       | 2.57 | 0.0074 |
| 184002_at   | C09F12.1  | clc-1  | CLaudin-like in Caenorhabditis                                     | 2.57 | 0.0102 |
| 178465_at   | C08B6.11  |        |                                                                    | 2.57 | 0.0055 |
| 183449_s_at | F45H10.4  | drr-1  | Dietary Restriction Response (WT but not eat-2 lifespan increased) | 2.56 | 0.0113 |
| 175462_s_at | T12A7.1   | gem-4  | Gon-2 Extragenic Modifier                                          | 2.56 | 0.0117 |
| 191899_at   | M04G7.2   |        | protein-tyrosine phosphatase                                       | 2.56 | 0.0209 |
| 181791_at   | T06A1.5   |        |                                                                    | 2.56 | 0.0037 |
| 188661_s_at | F42E11.4  | ttn-1  | TropoNin I                                                         | 2.56 | 0.0068 |
| 187219_at   | C34C12.6  |        |                                                                    | 2.55 | 0.0070 |
| 185243_at   | B0336.11  |        |                                                                    | 2.55 | 0.0091 |
| 183440_s_at | R09A1.3   |        |                                                                    | 2.54 | 0.0148 |
| 181555_at   | B0496.7   | valv-1 | VALVe cells defective                                              | 2.54 | 0.0277 |

|             |          |         |                                    |      |        |
|-------------|----------|---------|------------------------------------|------|--------|
| 189987_s_at | C26C6.3  | nas-36  | Nematode AStacin protease          | 2.54 | 0.0032 |
| 182169_at   | F47G6.2  |         |                                    | 2.54 | 0.0043 |
| 187962_at   | K02E2.4  | ins-35  | INSulin related                    | 2.54 | 0.0073 |
| 181137_at   | F46G10.1 |         |                                    | 2.54 | 0.0071 |
| 178929_at   | F47G9.3  | cutl-18 | CUTiclin-Like                      | 2.53 | 0.0069 |
| 177920_at   | D1086.3  |         |                                    | 2.53 | 0.0447 |
| 183702_at   | K05B2.4  |         |                                    | 2.53 | 0.0076 |
| 190134_s_at | T10B10.1 | col-41  | COLlagen                           | 2.52 | 0.0024 |
| 186070_at   | Y71H2B.7 | gpa-17  | G Protein, Alpha subunit           | 2.52 | 0.0167 |
| 180193_at   | F14F9.4  |         |                                    | 2.52 | 0.0118 |
| 182629_at   | C50D2.1  |         |                                    | 2.52 | 0.0044 |
| 179131_at   | T08G5.3  |         |                                    | 2.52 | 0.0073 |
| 184771_at   | H02F09.2 |         |                                    | 2.51 | 0.0048 |
| 192474_s_at | C31C9.2  |         | D-3-Phosphoglycerate dehydrogenase | 2.50 | 0.0114 |
| 176677_at   | D1014.6  |         |                                    | 2.50 | 0.0014 |
| 189362_at   | F56H11.3 | elo-7   | fatty acid ELONGation              | 2.50 | 0.0155 |

|             |           |         |                                                          |      |        |
|-------------|-----------|---------|----------------------------------------------------------|------|--------|
| 189558_at   | C14H10.3  |         |                                                          | 2.50 | 0.0045 |
| 173668_s_at | F52G2.3   |         |                                                          | 2.50 | 0.0062 |
| 185287_at   | Y53F4B.25 |         |                                                          | 2.50 | 0.0082 |
| 182502_at   | F18E9.4   |         |                                                          | 2.50 | 0.0165 |
| 183378_at   | F55G11.8  |         |                                                          | 2.49 | 0.0072 |
| 189150_at   | ZC416.4   | kgb-2   | Kinase, GLH-Binding                                      | 2.49 | 0.0116 |
| 183148_at   | F20D6.1   |         |                                                          | 2.49 | 0.0122 |
| 192012_s_at | T19D12.2  |         |                                                          | 2.49 | 0.0122 |
| 177276_at   | ZK6.8     |         |                                                          | 2.49 | 0.0145 |
| 188448_at   | D1069.2   | cpn-2   | CalPoNin                                                 | 2.49 | 0.0027 |
| 185554_s_at | Y39B6A.1  |         |                                                          | 2.49 | 0.0188 |
| 177369_at   | R52.3     | math-35 | MATH (meprin-associated Traf homology) domain containing | 2.49 | 0.0212 |
| 179076_at   | K10G4.3   |         |                                                          | 2.49 | 0.0209 |
| 184948_at   | Y57G11B.2 |         |                                                          | 2.48 | 0.0042 |
| 184596_s_at | F57H12.7  | mec-17  | MEChanosensory abnormality                               | 2.48 | 0.0049 |

|             |            |          |                                         |      |        |
|-------------|------------|----------|-----------------------------------------|------|--------|
| 189194_at   | F27E5.3    |          | homeobox domain                         | 2.48 | 0.0119 |
| 185193_at   | Y50E8A.12  |          |                                         | 2.48 | 0.0255 |
| 189100_at   | ZK896.6    | clec-187 | C-type LECTin                           | 2.48 | 0.0102 |
| 187906_at   | F31F6.5    | daf-6    | abnormal DAuer Formation                | 2.48 | 0.0045 |
| 185970_at   | ZK1055.4   |          |                                         | 2.48 | 0.0103 |
| 175163_at   | F45H7.4    | prk-2    | Pim (mammalian oncogene) Related Kinase | 2.47 | 0.0058 |
| 177670_at   | ZC64.2     | ttr-48   | TransThyretin-Related family domain     | 2.47 | 0.0058 |
| 174579_s_at | H24G06.1   |          |                                         | 2.47 | 0.0042 |
| 177410_at   | C01A2.2    |          |                                         | 2.47 | 0.0061 |
| 183222_at   | ZC449.1    |          |                                         | 2.47 | 0.0163 |
| 185758_at   | C14C11.3   | hex-2    | HEXosaminidase                          | 2.46 | 0.0052 |
| 180332_at   | Y51H4A.9   | col-137  | COLlagen                                | 2.46 | 0.0095 |
| 177325_at   | R57.2      |          |                                         | 2.46 | 0.0088 |
| 176222_at   | Y82E9BL.10 | fbxa-14  | F-box A protein                         | 2.46 | 0.0029 |
| 176395_at   | Y71G12B.18 |          |                                         | 2.46 | 0.0453 |
| 177868_s_at | T28F3.8    |          |                                         | 2.46 | 0.0078 |

|             |          |       |                                 |      |        |
|-------------|----------|-------|---------------------------------|------|--------|
| 181536_at   | F52B11.5 |       |                                 | 2.46 | 0.0041 |
| 193469_at   | T05A7.5  | fut-6 | FUcosyl Transferase             | 2.45 | 0.0078 |
| 175126_s_at | K08D8.5  |       |                                 | 2.45 | 0.0056 |
| 192138_at   | B0207.7  |       | serine/threonine-protein kinase | 2.45 | 0.0078 |
| 176217_at   | Y54E5A.1 |       |                                 | 2.45 | 0.0047 |
| 187668_at   | F47D12.6 |       |                                 | 2.45 | 0.0041 |
| 178710_at   | F59C6.2  |       |                                 | 2.45 | 0.0362 |
| 180523_at   | F47B10.5 |       |                                 | 2.44 | 0.0360 |
| 175870_s_at | Y34F4.4  |       |                                 | 2.44 | 0.0062 |
| 181653_at   | T22H9.3  |       |                                 | 2.44 | 0.0132 |
| 182106_at   | C34H4.1  |       |                                 | 2.44 | 0.0417 |
| 183713_at   | C24G7.2  |       |                                 | 2.44 | 0.0055 |
| 174896_at   | C14H10.3 |       |                                 | 2.44 | 0.0051 |
| 178927_at   | K08D8.5  |       |                                 | 2.44 | 0.0051 |
| 179316_at   | F58H1.6  |       |                                 | 2.44 | 0.0094 |
| 181618_at   | ZK418.2  |       | hypothetical protein            | 2.43 | 0.0125 |



|             |          |         |                                               |      |        |
|-------------|----------|---------|-----------------------------------------------|------|--------|
| 191666_s_at | R12A1.4  | ges-1   | abnormal Gut Esterase                         | 2.43 | 0.0061 |
| 175405_s_at | C15C7.7  |         |                                               | 2.43 | 0.0051 |
| 182667_at   | C13D9.1  | srr-6   | Serpentine Receptor, class R                  | 2.43 | 0.0261 |
| 188964_at   | D1081.5  |         | ankyrin motif                                 | 2.43 | 0.0058 |
| 181216_s_at | Y53H1B.2 |         |                                               | 2.43 | 0.0042 |
| 181111_at   | C24G6.7  | grl-1   | GRound-Like (grd related)                     | 2.43 | 0.0216 |
| 177631_at   | ZK596.3  |         |                                               | 2.43 | 0.0078 |
| 174407_at   | F08F1.8  | tth-1   | Tetra THymosin (four thymosin repeat protein) | 2.43 | 0.0055 |
| 193439_at   | Y70D2A.1 |         | 7 transmembrane receptor (rhodopsin family)   | 2.43 | 0.0094 |
| 171752_x_at | C18C4.5  |         |                                               | 2.42 | 0.0061 |
| 180514_at   | K10H10.4 |         |                                               | 2.42 | 0.0064 |
| 172761_x_at | T10C6.14 | his-1   | HIStone                                       | 2.42 | 0.0027 |
| 180072_s_at | F13D12.9 |         |                                               | 2.42 | 0.0139 |
| 180759_at   | F36H9.2  |         |                                               | 2.42 | 0.0081 |
| 183895_at   | Y43F8C.1 | nlp-25  | Neuropeptide-Like Protein                     | 2.42 | 0.0372 |
| 192613_at   | Y70C5C.6 | nhr-112 | Nuclear Hormone Receptor family               | 2.41 | 0.0097 |

|             |          |         |                                                 |      |        |
|-------------|----------|---------|-------------------------------------------------|------|--------|
| 173242_s_at | M01D7.5  | nlp-12  | Neuropeptide-Like Protein                       | 2.41 | 0.0051 |
| 193329_at   | F41E6.6  | tag-196 | Temporarily Assigned Gene name                  | 2.41 | 0.0035 |
| 187176_s_at | D2096.6  |         |                                                 | 2.41 | 0.0058 |
| 186597_at   | F19C6.5  |         |                                                 | 2.41 | 0.0099 |
| 194180_x_at | B0273.4  | unc-5   | UNCoordinated                                   | 2.40 | 0.0046 |
| 177267_at   | ZC8.3    | set-30  | SET (trithorax/polycomb) domain containing      | 2.40 | 0.0087 |
| 180911_at   | F52E1.9  |         |                                                 | 2.40 | 0.0033 |
| 176260_at   | Y58A7A.1 |         |                                                 | 2.40 | 0.0170 |
| 188965_at   | F55H12.3 |         | LDL receptor                                    | 2.40 | 0.0080 |
| 193529_at   | F55C5.2  |         | glycerophosphoryldiester phosphodiesterase like | 2.40 | 0.0142 |
| 176064_s_at | R05G9R.1 |         |                                                 | 2.40 | 0.0041 |
| 191718_s_at | C43C3.1  | ifp-1   | Intermediate Filament Protein, class E          | 2.40 | 0.0029 |
| 174461_at   | F58A4.11 | gei-13  | GEX Interacting protein                         | 2.39 | 0.0040 |
| 179620_s_at | T10G3.3  |         |                                                 | 2.39 | 0.0112 |
| 178656_at   | F36D1.6  |         |                                                 | 2.39 | 0.0163 |
| 174906_s_at | C25F6.2  | dlg-1   | Drosophila Discs Large homolog                  | 2.39 | 0.0080 |

|             |            |          |                                                  |      |        |
|-------------|------------|----------|--------------------------------------------------|------|--------|
| 190104_at   | E04D5.3    | cut-4    | CUTiclin                                         | 2.39 | 0.0062 |
| 182439_at   | Y17D7B.4   |          |                                                  | 2.39 | 0.0062 |
| 191638_s_at | C55B7.3    |          | protein-tyrosine phosphatase                     | 2.39 | 0.0166 |
| 192126_s_at | T24A11.3   | toh-1    | TOLLisH (Tolloid and BMP-1 family)               | 2.39 | 0.0132 |
| 176748_s_at | C18C4.5    |          |                                                  | 2.39 | 0.0078 |
| 188716_s_at | ZK430.8    | mlt-7    | MoLTing defective                                | 2.38 | 0.0184 |
| 193013_at   | T02E1.7    |          | Yeast hypothetical protein YG5Y like             | 2.38 | 0.0200 |
| 187522_at   | F25B5.1    | dct-6    | DAF-16/FOXO Controlled, germline Tumor affecting | 2.38 | 0.0065 |
| 193419_at   | F35B12.9   |          |                                                  | 2.37 | 0.0068 |
| 183663_s_at | Y41C4A.8   |          |                                                  | 2.37 | 0.0132 |
| 172635_x_at | Y38E10A.15 |          |                                                  | 2.37 | 0.0058 |
| 184823_at   | C01B10.4   |          |                                                  | 2.37 | 0.0165 |
| 189519_at   | R08F11.3   | cyp-33C8 | CYtochrome P450 family                           | 2.36 | 0.0068 |
| 193520_at   | W06B3.2    | sma-5    | SMAll                                            | 2.36 | 0.0068 |
| 172871_x_at | ZK131.7    | his-13   | HIStone                                          | 2.36 | 0.0113 |

|             |           |          |                                                |      |        |
|-------------|-----------|----------|------------------------------------------------|------|--------|
| 172871_x_at | ZK131.2   | his-25   | HIStone                                        | 2.36 | 0.0113 |
| 172871_x_at | ZK131.3   | his-9    | HIStone                                        | 2.36 | 0.0113 |
| 178071_at   | F56D5.2   |          |                                                | 2.36 | 0.0095 |
| 190628_at   | F32A5.4   |          |                                                | 2.36 | 0.0051 |
| 193579_at   | Y43C5B.2  |          | Src homology domain 2, tyrosine-protein kinase | 2.35 | 0.0376 |
| 188486_s_at | K10B4.6   | cwn-1    | WNT family                                     | 2.35 | 0.0040 |
| 181326_at   | F15E6.2   | lgc-22   | Ligand-Gated ion Channel                       | 2.35 | 0.0068 |
| 172292_x_at | D2092.8   |          |                                                | 2.35 | 0.0097 |
| 172184_x_at | Y46C8AL.2 | clec-174 | C-type LECTin                                  | 2.34 | 0.0207 |
| 181939_at   | F35C11.4  |          |                                                | 2.34 | 0.0029 |
| 188734_at   | ZK945.1   | lact-2   | beta-LACTamase domain containing               | 2.34 | 0.0196 |
| 174286_at   | F48F7.1   | alg-1    | Argonaute (plant)-Like Gene                    | 2.34 | 0.0318 |
| 177951_s_at | PDB1.1    |          |                                                | 2.34 | 0.0043 |
| 180471_at   | Y17G7B.8  |          |                                                | 2.33 | 0.0022 |
| 178834_at   | F47B8.2   |          |                                                | 2.33 | 0.0110 |
| 188168_at   | R07G3.2   | lips-17  | LIPaSe related                                 | 2.33 | 0.0016 |

|             |           |         |                                     |      |        |
|-------------|-----------|---------|-------------------------------------|------|--------|
| 188998_s_at | C05A9.1   | pgp-5   | P-GlycoProtein related              | 2.33 | 0.0161 |
| 171745_x_at | F56C11.2  | ptr-11  | PaTched Related family              | 2.33 | 0.0300 |
| 191856_s_at | K12F2.1   | myo-3   | MYOsin heavy chain structural genes | 2.33 | 0.0043 |
| 186843_at   | Y65B4BL.6 |         |                                     | 2.33 | 0.0123 |
| 178872_at   | C25F9.12  |         |                                     | 2.33 | 0.0452 |
| 178872_at   | C25F9.6   |         |                                     | 2.33 | 0.0452 |
| 179914_at   | F35E12.8  |         |                                     | 2.32 | 0.0127 |
| 176383_at   | C52D10.1  |         |                                     | 2.32 | 0.0037 |
| 179012_at   | K08E4.7   |         |                                     | 2.32 | 0.0382 |
| 189538_s_at | C01B7.4   | tag-117 | Temporarily Assigned Gene name      | 2.32 | 0.0147 |
| 172564_x_at | F26A10.1  |         |                                     | 2.32 | 0.0099 |
| 174629_at   | W01A11.3  | unc-83  | UNCoordinated                       | 2.32 | 0.0077 |
| 182039_at   | F37C4.3   | oac-23  | O-ACyltransferase homolog           | 2.31 | 0.0233 |
| 179402_at   | F52H3.5   |         |                                     | 2.31 | 0.0399 |
| 189580_at   | M04G12.2  | cpz-2   | CathePsin Z                         | 2.31 | 0.0072 |
| 184051_at   | C26F1.1   |         |                                     | 2.31 | 0.0062 |

|             |           |          |                                                    |      |        |
|-------------|-----------|----------|----------------------------------------------------|------|--------|
| 186748_at   | ZK512.1   |          |                                                    | 2.31 | 0.0035 |
| 192277_at   | R07B7.11  | gana-1   | Galactosidase/N-Acetylgalactosaminidase            | 2.31 | 0.0085 |
| 178938_at   | C50B6.9   |          |                                                    | 2.31 | 0.0040 |
| 172191_x_at | ZK1025.4  |          |                                                    | 2.31 | 0.0066 |
| 172191_x_at | C27C7.2   |          |                                                    | 2.31 | 0.0066 |
| 189629_at   | ZC373.7   | col-176  | COLlagen                                           | 2.30 | 0.0144 |
| 187705_at   | T25D10.1  |          |                                                    | 2.30 | 0.0369 |
| 193301_at   | T05A7.4   | hmg-11   | HMG                                                | 2.30 | 0.0065 |
| 173117_at   | H10E21.4  |          | Hypothetical protein (H10E21.4)                    | 2.30 | 0.0107 |
| 190566_at   | T12G3.1   |          | Drosophila REF (2)P like                           | 2.30 | 0.0106 |
| 193986_s_at | F08C6.4   | sto-1    | STOmatin                                           | 2.29 | 0.0091 |
| 184208_at   | Y17G7B.14 |          |                                                    | 2.29 | 0.0148 |
| 175391_at   | ZK678.8   | bus-17   | Bacterially Un-Swollen (M. nematophilum resistant) | 2.29 | 0.0088 |
| 192213_s_at | Y57G11A.1 | tag-273  | Temporarily Assigned Gene name                     | 2.29 | 0.0050 |
| 190899_at   | F21H7.1   | gst-22   | Glutathione S-Transferase                          | 2.29 | 0.0121 |
| 180562_at   | B0218.8   | cllec-52 | C-type LECTin                                      | 2.29 | 0.0083 |

|             |           |         |                                                        |      |        |
|-------------|-----------|---------|--------------------------------------------------------|------|--------|
| 179730_at   | F19C7.1   |         |                                                        | 2.29 | 0.0033 |
| 191134_at   | F17A9.3   |         | BZIP transcription factor                              | 2.29 | 0.0279 |
| 190234_at   | R10H1.4   | isl-1   | Inhibitor of Serine protease Like protein              | 2.29 | 0.0279 |
| 190234_at   | R10H1.1   |         | trypsin inhibitor                                      | 2.29 | 0.0279 |
| 188240_at   | C54H12.1  | ptr-6   | PaTched Related family                                 | 2.29 | 0.0035 |
| 173090_s_at | F35C5.8   | clec-65 | C-type LECTin                                          | 2.28 | 0.0067 |
| 174389_s_at | K02E10.4  |         |                                                        | 2.28 | 0.0131 |
| 179704_at   | C16D9.4   |         |                                                        | 2.28 | 0.0062 |
| 190177_at   | R05H10.6  | cdh-7   | CaDHerin family                                        | 2.28 | 0.0062 |
| 179563_at   | C25D7.16  |         |                                                        | 2.28 | 0.0068 |
| 179563_at   | C25D7.5   |         |                                                        | 2.28 | 0.0068 |
| 184284_s_at | T28F3.9   |         |                                                        | 2.28 | 0.0349 |
| 184284_s_at | Y51H4A.25 |         |                                                        | 2.28 | 0.0349 |
| 193258_at   | F27E5.4   | phg-1   | PHarynx-associated GAS (growth arrest protein) related | 2.28 | 0.0134 |
| 191624_at   | F47B10.7  | acbp-3  | Acyl-Coenzyme A Binding Protein                        | 2.28 | 0.0065 |
| 176071_at   | B0403.3   |         |                                                        | 2.27 | 0.0078 |

|             |           |          |                                                |      |        |
|-------------|-----------|----------|------------------------------------------------|------|--------|
| 174396_at   | B0496.3   | unc-82   | UNCoordinated                                  | 2.27 | 0.0030 |
| 190608_s_at | C09D4.3   |          | SER/THR protein kinase                         | 2.27 | 0.0063 |
| 175450_at   | F56D5.6   |          |                                                | 2.27 | 0.0086 |
| 172997_s_at | F56C9.7   |          |                                                | 2.27 | 0.0072 |
| 172321_x_at | C03A7.3   | abu-7    | Activated in Blocked Unfolded protein response | 2.27 | 0.0286 |
| 179118_at   | C25D7.4   | fbxa-82  | F-box A protein                                | 2.27 | 0.0113 |
| 182465_at   | Y17D7B.3  |          |                                                | 2.27 | 0.0454 |
| 189079_s_at | C25A11.4  | ajm-1    | Apical Junction Molecule                       | 2.26 | 0.0046 |
| 177956_at   | F13G3.2   | srd-53   | Serpentine Receptor, class D (delta)           | 2.26 | 0.0128 |
| 184547_at   | K12C11.6  |          |                                                | 2.26 | 0.0084 |
| 184547_at   | K12C11.7  |          |                                                | 2.26 | 0.0084 |
| 184733_at   | T06C12.10 | cgt-1    | Ceramide Glucosyl Transferase                  | 2.26 | 0.0051 |
| 192278_s_at | T16A9.4   |          | endothelin converting enzyme 1                 | 2.26 | 0.0140 |
| 173480_s_at | Y5H2B.5   | cyp-32B1 | CYtochrome P450 family                         | 2.26 | 0.0240 |
| 192917_s_at | F07A11.4  |          | ubiquitin carboxyl-terminal hydrolase          | 2.26 | 0.0061 |



|             |           |        |                                                |      |        |
|-------------|-----------|--------|------------------------------------------------|------|--------|
| 192943_at   | ZK1251.3  |        | 3-oxo-5-alpha-steroid 4-dehydrogenase          | 2.26 | 0.0225 |
| 188084_s_at | K04B12.1  | plx-2  | PLeXin                                         | 2.26 | 0.0073 |
| 188090_at   | F56H1.1   | che-14 | abnormal CHEmotaxis                            | 2.26 | 0.0067 |
| 183083_at   | C15C7.7   |        |                                                | 2.26 | 0.0050 |
| 179913_at   | E04F6.9   |        |                                                | 2.25 | 0.0058 |
| 188307_at   | Y53F4B.28 | ptr-20 | PaTched Related family                         | 2.25 | 0.0070 |
| 180039_at   | Y54E5A.1  |        |                                                | 2.25 | 0.0096 |
| 192216_at   | F58H1.7   |        |                                                | 2.25 | 0.0068 |
| 177270_at   | JC8.12    |        |                                                | 2.25 | 0.0071 |
| 172371_x_at | F44E7.3   |        |                                                | 2.25 | 0.0330 |
| 171862_s_at | R08E3.1   |        |                                                | 2.24 | 0.0036 |
| 179417_at   | F56D5.6   |        |                                                | 2.24 | 0.0065 |
| 175833_s_at | C48D5.1   | nhr-6  | Nuclear Hormone Receptor family                | 2.24 | 0.0151 |
| 175786_at   | T05A6.1   | cki-1  | CKI family (Cyclin-dependent Kinase Inhibitor) | 2.24 | 0.0264 |
| 183691_at   | F35C8.2   |        |                                                | 2.24 | 0.0283 |
| 171805_x_at | F22F1.1   | hil-3  | Histone H1.3                                   | 2.24 | 0.0049 |

|             |          |         |                             |      |        |
|-------------|----------|---------|-----------------------------|------|--------|
| 172472_x_at | B0222.8  | col-10  | COLlagen                    | 2.23 | 0.0073 |
| 172472_x_at | B0222.6  | col-144 | COLlagen                    | 2.23 | 0.0073 |
| 176616_s_at | F10E9.6  | mig-10  | abnormal cell MIGration     | 2.23 | 0.0046 |
| 180618_at   | F14D2.7  |         |                             | 2.23 | 0.0233 |
| 182935_at   | F36A4.3  |         |                             | 2.23 | 0.0266 |
| 193393_at   | C53D6.2  | unc-129 | UNCoordinated               | 2.23 | 0.0123 |
| 178138_at   | F38B7.2  |         |                             | 2.23 | 0.0219 |
| 186179_at   | K05F1.10 |         |                             | 2.23 | 0.0144 |
| 194078_s_at | D2085.1  | pyr-1   | PYRimidine biosynthesis     | 2.22 | 0.0070 |
| 192344_at   | C28G1.5  |         |                             | 2.22 | 0.0103 |
| 188299_at   | Y71F9B.5 | lin-17  | abnormal cell LINEage       | 2.22 | 0.0045 |
| 178165_at   | F46F3.3  |         |                             | 2.22 | 0.0255 |
| 176619_s_at | E01A2.3  | lin-44  | abnormal cell LINEage       | 2.22 | 0.0027 |
| 190822_s_at | R07B1.3  |         | membrane glycoprotein       | 2.22 | 0.0021 |
| 174029_at   | T14F9.4  | peb-1   | Pharyngeal Enhancer Binding | 2.22 | 0.0138 |
| 177374_at   | LLC1.2   |         |                             | 2.22 | 0.0051 |

|             |           |        |                                        |      |        |
|-------------|-----------|--------|----------------------------------------|------|--------|
| 172511_x_at | T28F3.8   |        |                                        | 2.21 | 0.0117 |
| 186477_at   | F36H12.14 |        |                                        | 2.21 | 0.0214 |
| 173561_s_at | R12C12.9  |        |                                        | 2.21 | 0.0154 |
| 188068_at   | F37A8.4   | nlp-10 | Neuropeptide-Like Protein              | 2.21 | 0.0040 |
| 172899_x_at | F08G2.3   | his-42 | HIStone                                | 2.21 | 0.0157 |
| 173620_s_at | C03A7.11  | ugt-51 | UDP-GlucuronosylTransferase            | 2.21 | 0.0252 |
| 193472_at   | ZK524.1   | spe-4  | defective SPERmatogenesis              | 2.20 | 0.0099 |
| 178687_at   | F15H9.1   |        |                                        | 2.20 | 0.0254 |
| 171737_x_at | T12G3.1   |        | Drosphila REF (2)P like                | 2.20 | 0.0307 |
| 184813_at   | C35A11.2  |        | hypothetical protein                   | 2.20 | 0.0327 |
| 191646_at   | F53F4.5   | fmo-4  | Flavin-containing MonoOxygenase family | 2.20 | 0.0073 |
| 192520_s_at | F36H2.5   |        |                                        | 2.20 | 0.0160 |
| 178944_at   | F45D3.2   |        |                                        | 2.20 | 0.0082 |
| 175504_at   | F17C11.11 |        |                                        | 2.20 | 0.0232 |
| 180642_at   | F53A9.2   |        |                                        | 2.20 | 0.0163 |
| 175264_at   | C05D10.4  |        |                                        | 2.20 | 0.0023 |

|             |           |          |                                                |      |        |
|-------------|-----------|----------|------------------------------------------------|------|--------|
| 190213_s_at | C16C8.2   |          | peroxidase precursor                           | 2.20 | 0.0079 |
| 172356_at   | K02E11.7  |          |                                                | 2.20 | 0.0098 |
| 193686_at   | F32A11.6  | moe-3    | See oma                                        | 2.20 | 0.0068 |
| 184258_at   | Y62E10A.3 |          |                                                | 2.20 | 0.0365 |
| 178042_at   | W01B6.4   |          |                                                | 2.19 | 0.0125 |
| 175817_at   | F48E3.1   | gly-12   | GLYcosylation related                          | 2.19 | 0.0123 |
| 189512_at   | C03G6.15  | cyp-35A2 | CYtochrome P450 family                         | 2.19 | 0.0253 |
| 171905_x_at | K10D6.2   |          |                                                | 2.19 | 0.0051 |
| 184953_at   | Y113G7B.3 | fbxa-115 | F-box A protein                                | 2.19 | 0.0205 |
| 180447_at   | F54C9.11  |          |                                                | 2.19 | 0.0057 |
| 191301_s_at | F47B10.2  |          | histidine ammonia-lyase                        | 2.18 | 0.0067 |
| 184183_s_at | R04B3.3   |          |                                                | 2.18 | 0.0023 |
| 185055_at   | C10H11.6  | ugt-26   | UDP-GlucuronosylTransferase                    | 2.18 | 0.0148 |
| 173015_s_at | Y54G2A.9  | clec-81  | C-type LECTin                                  | 2.18 | 0.0031 |
| 172323_x_at | C03A7.7   | abu-6    | Activated in Blocked Unfolded protein response | 2.18 | 0.0103 |

|             |            |          |                                                   |      |        |
|-------------|------------|----------|---------------------------------------------------|------|--------|
| 191621_s_at | R31.1      | sma-1    | SMAll                                             | 2.18 | 0.0058 |
| 176169_at   | Y82E9BL.14 | fbxa-80  | F-box A protein                                   | 2.18 | 0.0095 |
| 193265_at   | K10C3.3    | zig-1    | 2 (Zwei) IG-domain protein                        | 2.18 | 0.0036 |
| 188182_at   | F54C1.9    | sst-20   | Sperm Specific Transcript                         | 2.18 | 0.0132 |
| 174426_at   | F13H6.1    |          |                                                   | 2.18 | 0.0025 |
| 183736_at   | B0511.3    | fbxa-125 | F-box A protein                                   | 2.17 | 0.0303 |
| 187985_at   | F44G3.6    | skr-3    | SKp1 Related (ubiquitin ligase complex component) | 2.17 | 0.0058 |
| 184125_at   | C05D12.1   |          | hypothetical protein                              | 2.17 | 0.0023 |
| 180698_s_at | R12E2.9    | inx-15   | INneXin                                           | 2.17 | 0.0120 |
| 183575_at   | T14A8.2    |          |                                                   | 2.17 | 0.0107 |
| 183964_at   | T24A6.7    |          |                                                   | 2.17 | 0.0344 |
| 173148_s_at | R12H7.2    | asp-4    | ASpartyl Protease                                 | 2.17 | 0.0062 |
| 172309_x_at | C08E3.13   |          |                                                   | 2.17 | 0.0113 |
| 172309_x_at | C08E3.1    |          |                                                   | 2.17 | 0.0113 |
| 189882_at   | ZK484.2    | haf-9    | HAIF transporter (PGP related)                    | 2.16 | 0.0042 |
| 192403_s_at | F42G8.11   | sph-1    | SyaptoPHysin                                      | 2.16 | 0.0126 |

|             |          |         |                                       |      |        |
|-------------|----------|---------|---------------------------------------|------|--------|
| 180882_s_at | F18C5.5  |         |                                       | 2.16 | 0.0275 |
| 185439_at   | H20J04.1 |         |                                       | 2.16 | 0.0401 |
| 192034_s_at | D1009.1  |         |                                       | 2.16 | 0.0058 |
| 193321_at   | R04E5.10 | ifd-1   | Intermediate Filament, D              | 2.16 | 0.0190 |
| 173609_at   | Y39B6A.1 |         |                                       | 2.16 | 0.0038 |
| 183874_s_at | Y56A3A.7 |         |                                       | 2.16 | 0.0062 |
| 178900_s_at | F45D3.4  |         |                                       | 2.16 | 0.0254 |
| 177219_at   | M28.8    |         |                                       | 2.16 | 0.0302 |
| 188592_at   | E03A3.4  | his-70  | HIStone                               | 2.16 | 0.0173 |
| 177492_at   | F41E7.8  | cnc-8   | CaeNaCin (Caenorhabditis bacteriocin) | 2.16 | 0.0122 |
| 180391_s_at | F54A5.2  | cutl-20 | CUTiclin-Like                         | 2.15 | 0.0036 |
| 190607_at   | C09D4.3  |         | SER/THR protein kinase                | 2.15 | 0.0400 |
| 181113_at   | F40E10.5 |         |                                       | 2.15 | 0.0360 |
| 175726_s_at | H01A20.1 | nhr-3   | Nuclear Hormone Receptor family       | 2.15 | 0.0203 |
| 172671_x_at | K03A1.6  | his-38  | HIStone                               | 2.15 | 0.0024 |
| 189790_s_at | T10H10.1 | hum-6   | Heavy chain, Unconventional Myosin    | 2.15 | 0.0156 |

|             |          |        |                                            |      |        |
|-------------|----------|--------|--------------------------------------------|------|--------|
| 186846_s_at | F36G3.1  |        |                                            | 2.15 | 0.0116 |
| 171801_s_at | W03G11.4 |        |                                            | 2.15 | 0.0046 |
| 181683_at   | M03E7.2  |        |                                            | 2.14 | 0.0114 |
| 185566_at   | C05E11.3 |        |                                            | 2.14 | 0.0102 |
| 175453_at   | F48F7.2  | syn-2  | SYNtaxin                                   | 2.14 | 0.0377 |
| 178054_at   | C06G8.3  |        |                                            | 2.14 | 0.0153 |
| 175390_at   | F15D4.8  | flp-16 | FMRF-Like Peptide                          | 2.14 | 0.0098 |
| 189026_s_at | F32A7.5  |        |                                            | 2.14 | 0.0025 |
| 174641_at   | F08B12.1 |        |                                            | 2.14 | 0.0056 |
| 182552_at   | F22A3.2  | ttr-35 | TransThyretin-Related family domain        | 2.14 | 0.0062 |
| 193811_at   | F22D6.12 |        | beta-1,6-N-acetylglucosaminyltransferase   | 2.14 | 0.0048 |
| 179038_at   | F26A3.5  |        |                                            | 2.14 | 0.0035 |
| 177516_at   | T21C9.9  |        |                                            | 2.14 | 0.0186 |
| 181659_at   | F35D2.2  |        |                                            | 2.13 | 0.0051 |
| 178718_at   | T22A3.4  | set-18 | SET (trithorax/polycomb) domain containing | 2.13 | 0.0041 |
| 177487_at   | C29F3.7  |        |                                            | 2.13 | 0.0030 |

|             |           |          |                                         |      |        |
|-------------|-----------|----------|-----------------------------------------|------|--------|
| 187413_at   | C04F6.2   |          |                                         | 2.13 | 0.0046 |
| 180934_at   | K10B3.1   |          |                                         | 2.13 | 0.0059 |
| 191679_s_at | F56F4.5   | opt-3    | OligoPeptide Transporter                | 2.13 | 0.0049 |
| 172974_s_at | F19C7.1   |          |                                         | 2.13 | 0.0029 |
| 187260_s_at | ZK1320.2  |          |                                         | 2.12 | 0.0081 |
| 192199_at   | F11E6.8   |          |                                         | 2.12 | 0.0066 |
| 185519_at   | C25E10.9  | swm-1    | Sperm activation Without Mating         | 2.12 | 0.0054 |
| 179607_at   | C18E9.9   |          |                                         | 2.12 | 0.0127 |
| 185711_at   | T15B7.14  |          |                                         | 2.12 | 0.0271 |
| 179161_at   | C44F1.5   | acy-3    | Adenylyl Cyclase                        | 2.12 | 0.0096 |
| 174902_at   | K10D6.4   |          |                                         | 2.12 | 0.0061 |
| 183989_at   | F07G6.7   | fbxa-53  | F-box A protein                         | 2.12 | 0.0111 |
| 175519_at   | F59C6.11  |          |                                         | 2.11 | 0.0338 |
| 189671_at   | C50H11.15 | cyp-33C9 | CYtochrome P450 family                  | 2.11 | 0.0058 |
| 188754_at   | T27B1.2   | ztf-19   | Zinc finger Transcription Factor family | 2.11 | 0.0089 |



|             |           |          |                                                                                                            |      |        |
|-------------|-----------|----------|------------------------------------------------------------------------------------------------------------|------|--------|
| 174012_s_at | F53B2.8   |          |                                                                                                            | 2.11 | 0.0277 |
| 185685_at   | ZC513.10  | fbxa-223 | F-box A protein                                                                                            | 2.11 | 0.0407 |
| 192037_at   | F26D10.9  | atgp-1   | Amino acid Transporter GlycoProtein subunit                                                                | 2.11 | 0.0069 |
| 178854_at   | M05B5.2   |          |                                                                                                            | 2.11 | 0.0039 |
| 188523_at   | R13F6.9   | sma-3    | SMAll                                                                                                      | 2.11 | 0.0148 |
| 182513_at   | F08F1.8   | tth-1    | Tetra THymosin (four thymosin repeat protein)                                                              | 2.11 | 0.0027 |
| 191801_s_at | F33C8.1   | tag-53   | Temporarily Assigned Gene name                                                                             | 2.11 | 0.0042 |
| 187919_s_at | T09B4.7   |          |                                                                                                            | 2.11 | 0.0391 |
| 180214_at   | T13C2.3   |          |                                                                                                            | 2.11 | 0.0098 |
| 174122_s_at | T11B7.4   | alp-1    | ALP/Enigma encoding                                                                                        | 2.11 | 0.0057 |
| 189597_s_at | F59F4.1   |          | acyl-CoA oxidase I                                                                                         | 2.11 | 0.0058 |
| 174578_at   | H24G06.1  |          |                                                                                                            | 2.11 | 0.0047 |
| 182301_at   | H12D21.9  |          |                                                                                                            | 2.11 | 0.0137 |
| 181532_at   | F13H8.4   | nmgp-1   | Neuronal Membrane GlycoProtein                                                                             | 2.10 | 0.0050 |
| 188229_s_at | Y60A3A.18 | skr-4    | SKp1 Related (ubiquitin ligase complex component) ///<br>SKp1 Related (ubiquitin ligase complex component) | 2.10 | 0.0135 |

|             |          |          |                                                       |      |        |
|-------------|----------|----------|-------------------------------------------------------|------|--------|
| 186153_s_at | T27A10.7 | cgr-1    | CRAL/TRIO and GOLD domain suppressor of activated Ras | 2.10 | 0.0068 |
| 174147_at   | T21H8.1  |          |                                                       | 2.10 | 0.0066 |
| 185227_at   | F19F10.4 | ttr-10   | TransThyretin-Related family domain                   | 2.10 | 0.0112 |
| 172516_x_at | Y39G8B.1 |          |                                                       | 2.10 | 0.0045 |
| 180378_at   | C17F4.5  | fbxc-50  | F-box C protein                                       | 2.10 | 0.0041 |
| 189973_at   | T23H4.3  | nas-5    | Nematode AStacin protease                             | 2.10 | 0.0374 |
| 182172_at   | B0344.2  | wrt-9    | WaRThog (hedgehog-like family)                        | 2.10 | 0.0038 |
| 189457_at   | B0213.15 | cyp-34A9 | CYtochrome P450 family                                | 2.10 | 0.0209 |
| 179413_at   | K06A4.4  |          |                                                       | 2.10 | 0.0064 |
| 193037_s_at | T22B7.1  | egl-13   | EGg Laying defective                                  | 2.10 | 0.0049 |
| 174178_at   | C14C11.8 | pqn-13   | Prion-like-(Q/N-rich)-domain-bearing protein          | 2.10 | 0.0159 |
| 172735_x_at | T10E10.2 | col-167  | COLlagen                                              | 2.10 | 0.0145 |
| 172735_x_at | T10E10.1 | col-168  | COLlagen                                              | 2.10 | 0.0145 |
| 172735_x_at | T10E10.6 | col-170  | COLlagen                                              | 2.10 | 0.0145 |
| 180690_at   | F35E12.4 |          |                                                       | 2.10 | 0.0165 |

|             |            |        |                                  |      |        |
|-------------|------------|--------|----------------------------------|------|--------|
| 180658_at   | T01B6.1    |        |                                  | 2.10 | 0.0047 |
| 179806_at   | W05H9.1    |        |                                  | 2.09 | 0.0473 |
| 188756_s_at | Y116F11B.3 | pcp-4  | Prolyl Carboxy Peptidase like    | 2.09 | 0.0056 |
| 178229_at   | F01D5.7    |        |                                  | 2.09 | 0.0041 |
| 177629_at   | ZK593.3    |        |                                  | 2.09 | 0.0262 |
| 178065_at   | T21H8.1    |        |                                  | 2.09 | 0.0091 |
| 190357_at   | T28D6.4    |        | Ank repeat (8 domains)           | 2.09 | 0.0219 |
| 176453_at   | Y39G10AR.6 | ugt-31 | UDP-GlucuronosylTransferase      | 2.09 | 0.0180 |
| 179078_s_at | F54C9.3    |        |                                  | 2.08 | 0.0203 |
| 172859_x_at | C07E3.4    |        | Protein-tyrosine phosphatase     | 2.08 | 0.0303 |
| 174251_s_at | Y54G2A.4   |        |                                  | 2.08 | 0.0036 |
| 180008_at   | K06A1.2    |        |                                  | 2.08 | 0.0229 |
| 193844_at   | C34D1.5    | zip-5  | bZIP transcription factor family | 2.08 | 0.0403 |
| 175227_s_at | Y116A8C.38 |        |                                  | 2.08 | 0.0102 |
| 175227_s_at | Y116A8C.24 |        |                                  | 2.08 | 0.0102 |
| 181671_s_at | F56C9.7    |        |                                  | 2.08 | 0.0043 |

|             |           |         |                                                      |      |        |
|-------------|-----------|---------|------------------------------------------------------|------|--------|
| 180799_at   | C55C3.1   |         |                                                      | 2.08 | 0.0051 |
| 181585_at   | C29F5.3   |         |                                                      | 2.08 | 0.0275 |
| 184254_at   | C46H11.7  |         |                                                      | 2.08 | 0.0205 |
| 179117_at   | F32B4.2   |         |                                                      | 2.08 | 0.0169 |
| 173680_at   | T02C5.3   | igcm-3  | ImmunoGlobulin-like Cell adhesion Molecule family    | 2.08 | 0.0034 |
| 172746_x_at | T07H6.3   | col-166 | COLlagen                                             | 2.08 | 0.0106 |
| 172746_x_at | T10E10.5  | col-169 | COLlagen                                             | 2.08 | 0.0106 |
| 190301_s_at | C05E11.5  | amt-4   | AMmonium Transporter homolog                         | 2.07 | 0.0165 |
| 182227_s_at | K12F2.2   | vab-8   | Variable ABnormal morphology                         | 2.07 | 0.0097 |
| 185201_s_at | Y116A8C.4 |         |                                                      | 2.07 | 0.0098 |
| 185280_at   | H43E16.1  |         |                                                      | 2.07 | 0.0047 |
| 193566_at   | C06C6.4   | nhr-63  | Nuclear Hormone Receptor family                      | 2.07 | 0.0279 |
| 190228_s_at | T04C9.6   | frm-2   | FERM domain (protein4.1-ezrin-radixin-moesin) family | 2.07 | 0.0092 |
| 186270_s_at | F53C3.12  | bcmo-2  | Beta-Carotene 15,15'-MonoOxygenase                   | 2.07 | 0.0187 |
| 174021_at   | F16H11.5  | nhr-45  | Nuclear Hormone Receptor family                      | 2.07 | 0.0120 |
| 193319_at   | C44H4.2   | sym-5   | SYnthetic lethal with Mec                            | 2.07 | 0.0205 |

|             |           |         |                                           |      |        |
|-------------|-----------|---------|-------------------------------------------|------|--------|
| 175142_at   | F17C11.12 |         |                                           | 2.07 | 0.0092 |
| 190223_at   | K11E4.2   |         | Src homology domain 2                     | 2.07 | 0.0162 |
| 173944_at   | K10D3.4   |         | serine proteinase inhibitor (kunitz type) | 2.07 | 0.0127 |
| 184693_s_at | C32H11.11 |         |                                           | 2.07 | 0.0475 |
| 184693_s_at | C32H11.8  |         |                                           | 2.07 | 0.0475 |
| 181688_at   | W06D11.4  |         |                                           | 2.06 | 0.0038 |
| 190007_at   | R186.6    |         | Rhodanese-like domain                     | 2.06 | 0.0162 |
| 186385_at   | T25F10.3  |         |                                           | 2.06 | 0.0156 |
| 188332_at   | K06A4.3   | gsnl-1  | GelSoliN-Like                             | 2.06 | 0.0272 |
| 183590_at   | C50E3.6   |         |                                           | 2.06 | 0.0044 |
| 172422_x_at | K10D6.2   |         |                                           | 2.06 | 0.0051 |
| 177152_at   | Y45G5AM.3 |         |                                           | 2.06 | 0.0249 |
| 173224_s_at | C17C3.4   | ins-11  | INSulin related                           | 2.06 | 0.0113 |
| 178031_at   | C27H2.2   |         |                                           | 2.06 | 0.0062 |
| 189061_at   | F26A1.4   |         | Casein kinase                             | 2.06 | 0.0180 |
| 176925_at   | Y42H9B.1  | col-115 | COLlagen                                  | 2.06 | 0.0196 |

|             |            |          |                                                      |      |        |
|-------------|------------|----------|------------------------------------------------------|------|--------|
| 184065_at   | Y38F1A.7   |          |                                                      | 2.06 | 0.0067 |
| 186941_at   | F54H5.4    | mua-1    | MUScle Attachment abnormal                           | 2.06 | 0.0492 |
| 177499_at   | C38H2.2    |          |                                                      | 2.06 | 0.0076 |
| 190579_at   | C17G1.3    | ugt-23   | UDP-GlucuronosylTransferase                          | 2.06 | 0.0032 |
| 174406_at   | F13B10.1   | tir-1    | TIR (Toll and Interleukin 1 Receptor) domain protein | 2.06 | 0.0108 |
| 175943_at   | C02D5.2    |          |                                                      | 2.05 | 0.0161 |
| 173782_at   | M60.5      | kqt-2    | potassium channel, KvQLT family                      | 2.05 | 0.0111 |
| 181149_at   | F40A3.1    |          |                                                      | 2.05 | 0.0162 |
| 192140_at   | C06B8.7    |          | Human M130 antigen like protein                      | 2.05 | 0.0140 |
| 186214_at   | Y41G9A.5   |          |                                                      | 2.05 | 0.0079 |
| 184708_s_at | C43E11.5   |          |                                                      | 2.05 | 0.0238 |
| 184708_s_at | C50F2.5    |          |                                                      | 2.05 | 0.0238 |
| 186029_at   | T28C12.3   | fbxa-202 | F-box A protein                                      | 2.05 | 0.0344 |
| 186628_at   | Y38E10A.18 | nhr-234  | Nuclear Hormone Receptor family                      | 2.05 | 0.0057 |
| 173614_at   | C46H11.11  | fhod-1   | Formin HOMology Domain                               | 2.05 | 0.0283 |
| 185754_at   | C14F11.2   |          |                                                      | 2.04 | 0.0050 |

|             |           |        |                                            |      |        |
|-------------|-----------|--------|--------------------------------------------|------|--------|
| 193825_at   | C01C4.1   | nlp-1  | Neuropeptide-Like Protein                  | 2.04 | 0.0029 |
| 172679_x_at | B0035.9   | his-46 | HIStone                                    | 2.04 | 0.0239 |
| 172679_x_at | F54E12.3  | his-56 | HIStone                                    | 2.04 | 0.0239 |
| 172679_x_at | F22B3.1   | his-64 | HIStone                                    | 2.04 | 0.0239 |
| 189825_at   | C08F8.7   | rap-3  | RAP homolog (vertebrate Rap GTPase family) | 2.04 | 0.0499 |
| 178996_at   | C43F9.8   | efn-2  | Eph(F)riN                                  | 2.04 | 0.0052 |
| 178067_at   | F48F7.7   |        |                                            | 2.04 | 0.0144 |
| 184716_at   | Y46G5A.10 |        |                                            | 2.04 | 0.0150 |
| 178771_at   | F59C6.14  |        |                                            | 2.04 | 0.0112 |
| 178771_at   | F59C6.3   |        |                                            | 2.04 | 0.0112 |
| 175603_at   | R12H7.1   | unc-9  | UNCoordinated                              | 2.04 | 0.0041 |
| 174912_at   | T04F8.6   |        |                                            | 2.03 | 0.0162 |
| 183641_at   | F08B12.4  |        |                                            | 2.03 | 0.0089 |
| 186488_at   | T15H9.4   |        |                                            | 2.03 | 0.0249 |
| 175732_at   | F39C12.2  | add-1  | ADDucin                                    | 2.03 | 0.0058 |
| 184655_at   | T21E12.5  |        |                                            | 2.03 | 0.0128 |

|             |          |          |                                              |      |        |
|-------------|----------|----------|----------------------------------------------|------|--------|
| 172951_s_at | C39F7.2  |          |                                              | 2.03 | 0.0047 |
| 172823_x_at | B0035.7  | his-47   | HIStone                                      | 2.03 | 0.0067 |
| 180954_at   | C45G7.5  | cdh-10   | CaDHerin family                              | 2.03 | 0.0085 |
| 173164_s_at | C18D11.1 |          |                                              | 2.03 | 0.0066 |
| 178886_at   | F32D8.3  |          |                                              | 2.03 | 0.0041 |
| 185356_at   | F35D11.2 | pqn-35   | Prion-like-(Q/N-rich)-domain-bearing protein | 2.03 | 0.0243 |
| 178403_at   | F10A3.2  | fbxa-88  | F-box A protein                              | 2.02 | 0.0101 |
| 179499_s_at | C06H5.1  | fbxa-156 | F-box A protein                              | 2.02 | 0.0322 |
| 179499_s_at | C06H5.2  | fbxa-157 | F-box A protein                              | 2.02 | 0.0322 |
| 182330_s_at | Y37A1A.2 |          |                                              | 2.02 | 0.0166 |
| 177161_at   | R11.2    |          |                                              | 2.02 | 0.0113 |
| 190135_at   | F07C3.10 | nhr-36   | Nuclear Hormone Receptor family              | 2.02 | 0.0126 |
| 173571_s_at | T27E4.6  | oac-50   | O-ACyltransferase homolog                    | 2.02 | 0.0100 |
| 185693_at   | W02F12.2 |          |                                              | 2.02 | 0.0085 |
| 182615_at   | C54D10.9 |          |                                              | 2.02 | 0.0074 |
| 190144_at   | F22E10.1 | pgp-12   | P-GlycoProtein related                       | 2.02 | 0.0062 |



|             |          |        |                                 |      |        |
|-------------|----------|--------|---------------------------------|------|--------|
| 187944_at   | C18D1.3  | flp-4  | FMRF-Like Peptide               | 2.02 | 0.0179 |
| 178355_at   | C29F7.1  |        |                                 | 2.02 | 0.0162 |
| 172198_x_at | F15D3.3  | col-66 | COLlagen                        | 2.02 | 0.0133 |
| 178264_at   | F01D5.8  |        |                                 | 2.02 | 0.0063 |
| 177569_s_at | F35E2.6  | oac-19 | O-ACyltransferase homolog       | 2.02 | 0.0160 |
| 187654_s_at | F11G11.9 |        |                                 | 2.02 | 0.0430 |
| 193749_at   | F33D4.1  | nhr-8  | Nuclear Hormone Receptor family | 2.02 | 0.0090 |
| 172061_x_at | T21C12.1 | unc-49 | UNCoordinated                   | 2.02 | 0.0041 |
| 189584_s_at | F41E6.5  |        |                                 | 2.02 | 0.0099 |
| 187036_at   | F13E9.13 |        |                                 | 2.02 | 0.0140 |
| 185717_s_at | F21C10.7 |        |                                 | 2.01 | 0.0071 |
| 182433_s_at | C25D7.12 |        |                                 | 2.01 | 0.0226 |
| 191828_at   | R08E3.1  |        |                                 | 2.01 | 0.0042 |
| 179646_at   | C18E9.8  |        |                                 | 2.01 | 0.0070 |
| 189660_at   | F59D6.3  |        | aspartyl protease               | 2.01 | 0.0326 |
| 193267_at   | F13D11.1 |        |                                 | 2.01 | 0.0362 |

|             |           |        |                                       |      |        |
|-------------|-----------|--------|---------------------------------------|------|--------|
| 181257_at   | F17C11.2  |        |                                       | 2.01 | 0.0070 |
| 172545_x_at | W08E12.4  |        |                                       | 2.01 | 0.0302 |
| 172545_x_at | W08E12.5  |        |                                       | 2.01 | 0.0302 |
| 180524_at   | T22B2.6   |        |                                       | 2.01 | 0.0100 |
| 173737_at   | C01C10.3  | acl-12 | ACyLtransferase-like                  | 2.01 | 0.0127 |
| 184698_at   | Y49E10.16 |        |                                       | 2.01 | 0.0070 |
| 193164_at   | C37E2.2   |        |                                       | 2.01 | 0.0075 |
| 173777_s_at | F14H8.6   | cng-1  | Cyclic Nucleotide Gated channel       | 2.00 | 0.0081 |
| 171910_x_at | C01G6.1   | aqp-2  | AQuaPorin or aquaglyceroporin related | 2.00 | 0.0042 |

Table S2. Representation factors for gene sets among OCTR-1-regulated genes.

| Gene set             | Genes in Set | Genes in Common | Representation Factor | <i>p</i> -value |
|----------------------|--------------|-----------------|-----------------------|-----------------|
| PMK-1-induced genes  | 144          | 21              | 2.9                   | <1.001e-05      |
| DAF-16-induced genes | 263          | 44              | 3.3                   | <1.612e-12      |
| CED-1-induced genes  | 218          | 43              | 3.9                   | <7.827e-15      |

The representation factor is the number of overlapping genes divided by the expected number of overlapping genes drawn from the group of OCTR-1-regulated genes and the group corresponding to a give gene set.

For details, see [http://elegans.uky.edu/MA/progs/overlap\\_stats.html](http://elegans.uky.edu/MA/progs/overlap_stats.html)

PMK-1-induced genes from Troemel *et al.*, 2006. PloS Genet 2, e183.

DAF-16-induced genes from Murphy *et al.*, 2003. Nature 424, 277-283.

CED-1-induced genes from Haskins *et al.*, 2008. Dev Cell 15, 87-97.

Table S3. *pqn/abu* genes are up-regulated by ER stress in *xbp-1(zc12) III* mutant animals.

| Genes                | Induction in <i>xbp-1</i> * |                        |
|----------------------|-----------------------------|------------------------|
| <i>abu-1</i>         | 1.42±0.16                   | 1.45±0.29 <sup>§</sup> |
| <i>abu-6</i>         | 2.12±0.17                   | 1.75±0.28 <sup>§</sup> |
| <i>abu-7</i>         | 1.60±0.22                   | 1.22±0.49 <sup>§</sup> |
| <i>abu-8</i>         | 1.97±0.24                   | 1.77±0.29 <sup>§</sup> |
| <i>abu-12/pqn-40</i> | 1.41±0.07                   |                        |
| <i>abu-13/pqn-46</i> | 1.68±0.11                   |                        |
| <i>abu-14/pqn-95</i> | 1.15±0.03                   |                        |
| <i>abu-15/pqn-5</i>  | 1.60±0.07                   |                        |

\*Shown is the mean±SD of fold increase in tunicamycin-treated versus untreated *xbp-1* mutant animals. Student's exact *t*-test indicates that all differences between tunicamycin-treated animals and untreated animals are significantly different ( $P < 0.05$ ); N=3.

<sup>§</sup>Induction by tunicamycin in *xbp-1* observed by Urano et al. J Cell Biol. 2002 Aug 19;158(4):639-46.

Table S4. Prediction of signal peptide and transmembrane domains in PQN/ABU protein sequences

|               | <b>Signal peptide</b> | <b>TM region</b> |
|---------------|-----------------------|------------------|
| ABU-1/PQN-2   | Y                     | 1                |
| ABU-6         | Y                     | 1                |
| ABU-7         | Y                     | 1                |
| ABU-8         | Y                     | 1                |
| PQN-5/ABU-15  | Y                     | 1                |
| PQN-13        | Y                     | 1                |
| PQN-32        | Y                     | 1                |
| PQN-35        | none                  | 1                |
| PQN-40/ABU-12 | Y                     | 1                |
| PQN-46/ABU-13 | none                  | none             |
| PQN-47        | none                  | 1                |
| PQN-89        | Y                     | 4                |
| PQN-95/ABU-14 | Y                     | 2                |

Signal peptide in PQN/ABU proteins

|               | <b>Signal peptide probability</b> | <b>Probable cleavage site</b> |
|---------------|-----------------------------------|-------------------------------|
| ABU-1/PQN-2   | 1                                 | aa 19-20                      |
| ABU-6         | 0.999                             | aa 21-22                      |
| ABU-7         | 0.997                             | aa 19-20                      |
| ABU-8         | 0.996                             | aa 19-20                      |
| PQN-5/ABU-15  | 0.997                             | aa 21-22                      |
| PQN-13        | 0.999                             | aa 18-19                      |
| PQN-32        | 0.999                             | aa 31-32                      |
| PQN-35        | 0.006                             |                               |
| PQN-40/ABU-12 | 0.999                             | aa 19-20                      |
| PQN-46/ABU-13 | 0                                 |                               |

|               |       |          |
|---------------|-------|----------|
| PQN-47        | 0     |          |
| PQN-89        | 0.993 | aa 22-23 |
| PQN-95/ABU-14 | 0.999 | aa 24-25 |

---

The amino acid sequences were predicted with the use of SIGNALP tool  
<http://www.cbs.dtu.dk/services/SignalP/>

### Transmembrane domains in PQN/ABU proteins

---

|               | <b>TM domains (aa residues)</b> | <b>TMPRED score</b> | <b>Orientation</b> |
|---------------|---------------------------------|---------------------|--------------------|
| ABU-1/PQN-2   | 1 to 22                         | 1695                | o-i                |
| ABU-6         | 3 to 22                         | 2063                | o-i                |
| ABU-7         | 3 to 22                         | 2267                | o-i                |
| ABU-8         | 3 to 22                         | 2277                | o-i                |
| PQN-5/ABU-15  | 3 to 22                         | 2073                | o-i                |
| PQN-13        | 1 to 19                         | 1397                | i-o                |
| PQN-32        | 1 to 23                         | 1501                | o-i                |
| PQN-35        | 56 to 79                        | 2661                | i-o                |
| PQN-40/ABU-12 | 35 to 57                        | 1521                | i-o                |
| PQN-46/ABU-13 | none                            |                     |                    |
| PQN-47        | 657-659                         | 2318                | o-i                |
| PQN-89        | 6 to 24                         | 1437                | i-o                |
|               | 271 to 293                      | 1088                | o-i                |
|               | 306 to 323                      | 772                 | i-o                |
|               | 366-388                         | 3266                | o-i                |
| PQN-95/ABU-14 | 6 to 24                         | 1960                | i-o                |
|               | 345 to 369                      | 531                 | o-i                |

---

Transmembrane (TM) domains were predicted using TMPRED program available at  
[http://www.ch.embnet.org/software/TMPRED\\_form.html](http://www.ch.embnet.org/software/TMPRED_form.html)  
The algorithm is based on the statistical analysis of TMbase,

a database of naturally occurring transmembrane proteins.

The prediction is made using a combination of several weight-matrices for scoring.

Scores above 500 are considered significant.

o-i N terminus out

Table S5: *abu* genes are up-regulated in wild-type animals following *P. aeruginosa* infection for 4 hours at 25°C.

| Gene name     | Induction in PA14-infected WT animals* |
|---------------|----------------------------------------|
| <i>abu-1</i>  | 2.00±0.25                              |
| <i>abu-6</i>  | 1.91±0.12                              |
| <i>abu-7</i>  | 2.03±0.06                              |
| <i>abu-8</i>  | 1.84±0.16                              |
| <i>abu-12</i> | 1.46±0.03                              |
| <i>abu-13</i> | 1.54±0.08                              |
| <i>abu-14</i> | 1.21±0.02                              |
| <i>abu-15</i> | 2.07±0.11                              |

\* Shown is the mean±SD of fold increase in *P. aeruginosa* PA14-infected wild-type animals versus *E. coli* OP50-exposed wild-type animals. Student's exact *t*-test indicates that all differences between *P. aeruginosa* PA-14-exposed animals and *E. coli* OP50-exposed animals are significantly different (P<0.05); N=3.



Table S6

| <b>RNAi construct</b> | <b>Cross-reacting <i>pqn/abu</i> genes</b>                 |
|-----------------------|------------------------------------------------------------|
| <i>abu-1</i>          | <i>abu-2, abu-4, abu-5, pqn-76, pqn-78, pqn-79, pqn-91</i> |
| <i>abu-7</i>          | <i>abu-6, abu-8, abu-9, abu-10, pqn-5, pqn-54, pqn-57</i>  |
| <i>abu-8</i>          | <i>abu-6, abu-7, abu-9, abu-10, pqn-5, pqn-54, pqn-57</i>  |
| <i>pqn-40/abu-12</i>  | NONE per this analysis                                     |
| <i>pqn-46/abu-13</i>  | NONE per this analysis                                     |

To identify potential off-target cross-reactions, the BLAST algorithm was used.

In *C. elegans*, cross-RNAi is known to occur when a target mRNA shares at least 95% identity, over a span of 40 or more nucleotides, to the dsRNA encoded by the RNAi construct.

| <i>abu-1</i>    |             |               |              |            |             |                     |
|-----------------|-------------|---------------|--------------|------------|-------------|---------------------|
| <b>IDENTITY</b> | <b>CHRO</b> | <b>STRAND</b> | <b>START</b> | <b>END</b> | <b>SPAN</b> | <b>GENE</b>         |
| 100             | V           | minus         | 10381800     | 10380316   | 1278        | <i>abu-1</i>        |
| 87              | IV          | plus          | 15291875     | 15293411   | 1260        | <i>pqn-91</i>       |
| 87              | IV          | plus          | 15291875     | 15293411   | 1265        | <i>pqn-91</i>       |
| 89              | IV          | plus          | 15590665     | 15591740   | 544         | <i>pqn-5/abu-15</i> |
| 90              | IV          | plus          | 15590665     | 15591740   | 438         | <i>pqn-5/abu-15</i> |
| 89              | IV          | plus          | 15595003     | 15593928   | 544         | <i>pqn-78</i>       |
| 90              | IV          | plus          | 15595003     | 15593928   | 438         | <i>pqn-78</i>       |
| 89              | IV          | plus          | 15595538     | 15596613   | 544         | <i>pqn-79</i>       |
| 90              | IV          | plus          | 15595538     | 15596613   | 438         | <i>pqn-79</i>       |
| 89              | IV          | plus          | 15579054     | 15580129   | 544         | <i>pqn-76</i>       |

|    |    |      |          |          |     |                |
|----|----|------|----------|----------|-----|----------------|
| 90 | IV | plus | 15579054 | 15580129 | 438 | <i>pqn-76</i>  |
| 87 | V  | plus | 2274522  | 2272440  | 541 | <i>Y5H2A.4</i> |
| 89 | V  | plus | 2274522  | 2272440  | 335 | <i>Y5H2A.4</i> |
| 87 | V  | plus | 2274522  | 2272440  | 358 | <i>Y5H2A.4</i> |
| 88 | V  | plus | 2274881  | 2275976  | 435 | <i>abu-4</i>   |
| 84 | V  | plus | 2274881  | 2275976  | 555 | <i>abu-4</i>   |
| 83 | X  | plus | 1410647  | 1408831  | 568 | <i>abu-2</i>   |
| 78 | X  | plus | 1410647  | 1408831  | 189 | <i>abu-2</i>   |

---

*abu-7*

| <b>IDENTITY</b> | <b>CHRO</b> | <b>STRAND</b> | <b>START</b> | <b>END</b> | <b>SPAN</b> | <b>GENE</b>         |
|-----------------|-------------|---------------|--------------|------------|-------------|---------------------|
| 100             | V           | plus          | 5164743      | 5163380    | 1317        | <i>abu-7</i>        |
| 96              | V           | plus          | 5194592      | 5192977    | 1338        | <i>abu-8</i>        |
| 98              | V           | plus          | 5158608      | 5159882    | 871         | <i>pqn-5/abu-15</i> |
| 95              | V           | plus          | 5158608      | 5159882    | 396         | <i>pqn-5/abu-15</i> |
| 97              | V           | plus          | 5161877      | 5160587    | 873         | <i>abu-6</i>        |
| 99              | V           | plus          | 5161877      | 5160587    | 369         | <i>abu-6</i>        |
| 83              | V           | plus          | 1464990      | 1466350    | 827         | <i>pqn-54</i>       |
| 80              | V           | plus          | 1464990      | 1466350    | 391         | <i>pqn-54</i>       |
| 82              | X           | plus          | 8322059      | 8323291    | 794         | <i>abu-9</i>        |
| 82              | X           | plus          | 8320934      | 8319616    | 794         | <i>pqn-57</i>       |

---

*abu-8*

| <b>IDENTITY</b> | <b>CHRO</b> | <b>STRAND</b> | <b>START</b> | <b>END</b> | <b>SPAN</b> | <b>GENE</b>         |
|-----------------|-------------|---------------|--------------|------------|-------------|---------------------|
| 100             | V           | plus          | 5194592      | 5192977    | 1338        | <i>abu-8</i>        |
| 96              | V           | plus          | 5164743      | 5163380    | 1337        | <i>abu-7</i>        |
| 93              | V           | plus          | 5158608      | 5159882    | 871         | <i>pqn-5/abu-15</i> |
| 95              | V           | plus          | 5158608      | 5159882    | 396         | <i>pqn-5/abu-15</i> |
| 93              | V           | plus          | 5161877      | 5160587    | 873         | <i>abu-6</i>        |
| 98              | V           | plus          | 5161877      | 5160587    | 368         | <i>abu-6</i>        |
| 83              | V           | plus          | 1464990      | 1466350    | 827         | <i>pqn-54</i>       |
| 80              | V           | plus          | 1464990      | 1466350    | 391         | <i>pqn-54</i>       |
| 82              | X           | plus          | 8322059      | 8323291    | 723         | <i>abu-9</i>        |
| 82              | X           | plus          | 8320934      | 8319616    | 723         | <i>pqn-57</i>       |

*pqn-40/abu-12*

| <b>IDENTITY</b> | <b>CHRO</b> | <b>STRAND</b> | <b>START</b> | <b>END</b> | <b>SPAN</b> | <b>GENE</b>   |
|-----------------|-------------|---------------|--------------|------------|-------------|---------------|
| 100             | X           | plus          | 457649       | 450446     | 2325        | <i>pqn-40</i> |

*pqn-46/abu-13*

| <b>IDENTITY</b> | <b>CHRO</b> | <b>STRAND</b> | <b>START</b> | <b>END</b> | <b>SPAN</b> | <b>GENE</b>   |
|-----------------|-------------|---------------|--------------|------------|-------------|---------------|
| 100             | III         | plus          | 6944683      | 6941833    | 1113        | <i>pqn-46</i> |

## References for *Science Online Materials*

1. S. Brenner, *Genetics* **77**, 71 (1974).
2. M. W. Tan, S. Mahajan-Miklos, F. M. Ausubel, *Proc Natl Acad Sci U S A* **96**, 715 (1999).
3. C. Wray, W. J. Sojka, *Res Vet Sci* **25**, 139 (1978).
4. E. Pradel *et al.*, *Proc Natl Acad Sci U S A* **104**, 2295 (2007).
5. A. G. Fraser *et al.*, *Nature* **408**, 325 (2000).
6. L. Timmons, A. Fire, *Nature* **395**, 854 (1998).
7. J. F. Rual, N. Klitgord, G. Achaz, *BMC Genomics* **8**, 106 (2007).
8. K. J. Livak, T. D. Schmittgen, *Methods* **25**, 402 (2001).
